# Supplementary material for: Characterization and Comparative Analysis of Chloroplast Genomes of Medicinal Herb Scrophularia ningpoensis and Its Common Adulterants (Scrophulariaceae)
Source: MDPI journal article supplement (doi:10.3390/ijms241210034), 2023-06-12
Supplement: s1 [file s1]

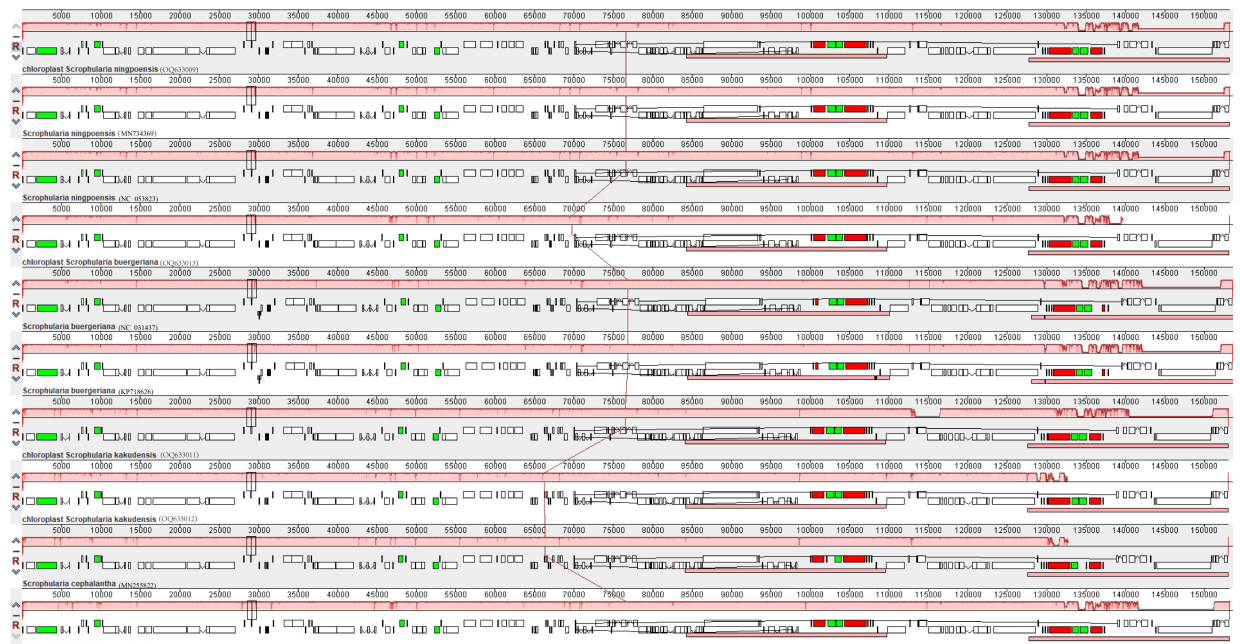

Supplementary Figure S1. The collinearity analysis diagram of 10 *Scrophularia* individuals.

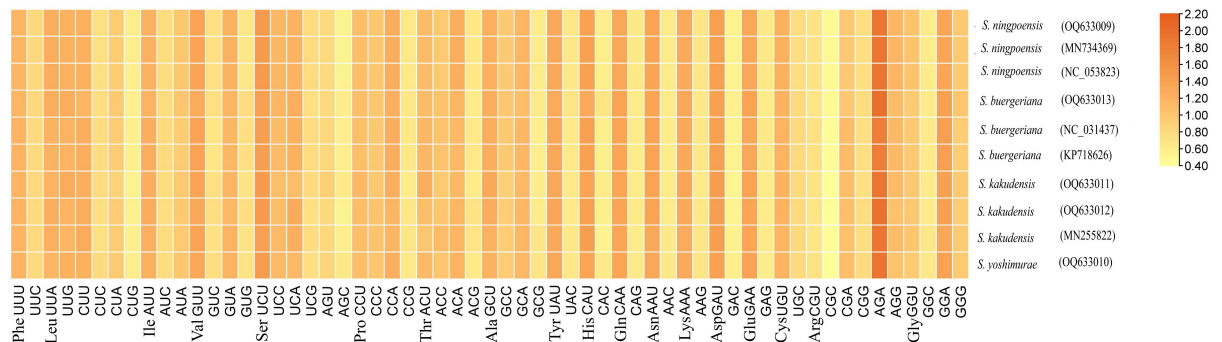

Supplementary Figure S2. Codon bias heat map of 10 *Scrophularia* individuals.
