# Supplementary material for: Characterization and Comparative Analysis of Chloroplast Genomes of Medicinal Herb Scrophularia ningpoensis and Its Common Adulterants (Scrophulariaceae)
Source: MDPI journal article supplement (doi:10.3390/ijms241210034), 2023-06-12
Supplement: s1 [file s1]

Supplementary Table S2. Gene composition of *Scrophularia* chloroplast genomes.

| Groups of Gene                                    | Name of Gene                                                                                                                                                                                                                                                                                                                                                                                                                                                                                                                                                                                                                                                                  |
|---------------------------------------------------|-------------------------------------------------------------------------------------------------------------------------------------------------------------------------------------------------------------------------------------------------------------------------------------------------------------------------------------------------------------------------------------------------------------------------------------------------------------------------------------------------------------------------------------------------------------------------------------------------------------------------------------------------------------------------------|
| Ribosomal RNAs                                    | <i>rrn16</i> (×2), <i>rrn23</i> (×2), <i>rrn4.5</i> (×2), <i>rrn5</i> (×2)                                                                                                                                                                                                                                                                                                                                                                                                                                                                                                                                                                                                    |
| Transfer RNAs                                     | <sup>a</sup> <i>trnA</i> -UGC(×2), <i>trnC</i> -GCA, <i>trnD</i> -GUC, <i>trnE</i> -UUC, <i>trnF</i> -GAA, <i>trnI</i> <sup>M</sup> -CAU, <sup>a</sup> <i>trnG</i> -GCC<br><i>trnG</i> -UCC, <i>trnI</i> -CAU(×2), <i>trnH</i> -GUG, <sup>a</sup> <i>trnI</i> -GAU(×2), <i>trnK</i> -UUU, <i>trnL</i> -CAA(×2)<br><sup>a</sup> <i>trnL</i> -UAA, <i>trnL</i> -UAG, <i>trnM</i> -CAU, <i>trnN</i> -GUU(×2), <i>trnP</i> -UGG, <i>trnQ</i> -UUG, <i>trnR</i> -ACG(×2)<br><i>trnR</i> -UCU, <i>trnS</i> -GCU, <i>trnS</i> -GGA, <i>trnS</i> -UGA, <i>trnT</i> -GGU, <i>trnT</i> -UGU, <i>trnV</i> -GAC(×2),<br><sup>a</sup> <i>trnV</i> -UAC, <i>trnW</i> -CCA, <i>trnY</i> -GUA |
| Photosystem I                                     | <i>psaA</i> , <i>psaB</i> , <i>psaC</i> , <i>psaI</i> , <i>psaJ</i>                                                                                                                                                                                                                                                                                                                                                                                                                                                                                                                                                                                                           |
| Photosystem II                                    | <i>psbA</i> , <i>psbB</i> , <i>psbC</i> , <i>psbD</i> , <i>psbE</i> , <i>psbF</i> , <i>psbH</i> , <i>psbI</i> , <i>psbJ</i> , <i>psbK</i> , <i>psbL</i> , <i>psbM</i> , <i>psbN</i> , <i>psbT</i> , <i>psbZ</i>                                                                                                                                                                                                                                                                                                                                                                                                                                                               |
| Cytochrome                                        | <i>petA</i> , <sup>a</sup> <i>petB</i> , <sup>a</sup> <i>petD</i> , <i>petG</i> , <i>petL</i> , <i>petN</i>                                                                                                                                                                                                                                                                                                                                                                                                                                                                                                                                                                   |
| ATP synthase                                      | <i>atpA</i> , <i>atpB</i> , <i>atpE</i> , <sup>a</sup> <i>atpF</i> , <i>atpH</i> , <i>atpI</i>                                                                                                                                                                                                                                                                                                                                                                                                                                                                                                                                                                                |
| Rubisco                                           | <i>rbcL</i>                                                                                                                                                                                                                                                                                                                                                                                                                                                                                                                                                                                                                                                                   |
| NADH dehydrogenase                                | <i>ndhA</i> , <sup>a</sup> <i>ndhB</i> (×2), <i>ndhC</i> , <i>ndhD</i> , <i>ndhE</i> , <i>ndhF</i> , <i>ndhG</i> , <i>ndhH</i> , <i>ndhI</i> , <i>ndhJ</i> , <i>ndhK</i>                                                                                                                                                                                                                                                                                                                                                                                                                                                                                                      |
| ATP-dependent protease subunit P                  | <sup>b</sup> <i>clpP</i>                                                                                                                                                                                                                                                                                                                                                                                                                                                                                                                                                                                                                                                      |
| Chloroplast translational initiation factor       | <i>infA</i>                                                                                                                                                                                                                                                                                                                                                                                                                                                                                                                                                                                                                                                                   |
| Chloroplast envelope membrane protein             | <i>cemA</i>                                                                                                                                                                                                                                                                                                                                                                                                                                                                                                                                                                                                                                                                   |
| Large units                                       | <i>rpl33</i> , <i>rpl20</i> , <i>rpl36</i> , <i>rpl14</i> , <sup>a</sup> <i>rpl16</i> , <sup>a</sup> <i>rpl2</i> (×2), <i>rpl23</i> (×2), <i>rpl32</i> , <i>rpl22</i>                                                                                                                                                                                                                                                                                                                                                                                                                                                                                                         |
| Small units                                       | <sup>a</sup> <i>rps16</i> , <i>rps2</i> , <i>rps14</i> , <i>rps4</i> , <i>rps18</i> , <sup>b</sup> <i>rps12</i> (×2), <i>rps11</i> , <i>rps8</i> , <i>rps19</i> , <i>rps3</i> , <i>rps7</i> (×2), <i>rps15</i>                                                                                                                                                                                                                                                                                                                                                                                                                                                                |
| RNA polymerase                                    | <i>rpoC2</i> , <sup>a</sup> <i>rpoC1</i> , <i>rpoB</i> , <i>rpoA</i>                                                                                                                                                                                                                                                                                                                                                                                                                                                                                                                                                                                                          |
| Miscellaneous proteins                            | <i>matK</i> , <i>accD</i> , <i>ccsA</i>                                                                                                                                                                                                                                                                                                                                                                                                                                                                                                                                                                                                                                       |
| Hypothetical proteins and conserved reading frame | <sup>b</sup> <i>ycf3</i> , <i>ycf4</i> , <i>ycf2</i> (×2), <i>ypcfl</i> , <i>ycf15</i> (×2)                                                                                                                                                                                                                                                                                                                                                                                                                                                                                                                                                                                   |

a Indicates the genes containing a single intron. b Indicates the genes containing two introns. (×2) Indicates genes duplicated in the IR regions.
