# Supplementary material for: Characterization and Comparative Analysis of Chloroplast Genomes of Medicinal Herb Scrophularia ningpoensis and Its Common Adulterants (Scrophulariaceae)
Source: MDPI journal article supplement (doi:10.3390/ijms241210034), 2023-06-12
Supplement: s1 [file s1]

**Table S8.** The list of 28 chloroplast genomes from Scrophulariaceae in phylogenetic analyses.

| Genus               | Taxon                   | GenBank Accession |
|---------------------|-------------------------|-------------------|
| <i>Scrophularia</i> | <i>S.buergeriana</i>    | KP718626          |
|                     | <i>S.buergeriana</i>    | NC_031437         |
|                     | <i>S.buergeriana</i>    | OQ633013          |
|                     | <i>S.yoshimurae</i>     | OQ633010          |
|                     | <i>S.ningpoensis</i>    | MN734369          |
|                     | <i>S.ningpoensis</i>    | NC_053823         |
|                     | <i>S.ningpoensis</i>    | OQ633009          |
|                     | <i>S.kakudensis</i>     | OQ633012          |
|                     | <i>S.kakudensis</i>     | MN255822          |
|                     | <i>S.kakudensis</i>     | OQ633011          |
|                     | <i>S. henryi</i>        | MF861203          |
|                     | <i>S. takesimensis</i>  | KP718628          |
|                     | <i>S. incisa</i>        | OP036429          |
|                     | <i>S. incisa</i>        | OP018675          |
|                     | <i>S. kiriloviana</i>   | OP018676          |
|                     | <i>S. kiriloviana</i>   | OP036428          |
|                     | <i>S. dentata</i>       | MF861202          |
|                     | <i>S. dentata</i>       | OP018677          |
|                     | <i>S. integrifolia</i>  | OP018678          |
| <i>Verbascum</i>    | <i>V. chinense</i>      | MT610040          |
|                     | <i>V. phoeniceum</i>    | MN893301          |
| <i>Buddleja</i>     | <i>B. officinalis</i>   | MZ955034          |
|                     | <i>B. sessilisfolia</i> | MH411149          |
| <i>Diocirea</i>     | <i>D. violacea</i>      | MN044644          |
| <i>Eremophila</i>   | <i>E. oppositifolia</i> | MN044645          |
| <i>Myoporum</i>     | <i>M. bontiodides</i>   | NC050956          |
|                     | <i>M. laetum</i>        | MN044641          |
| <i>Leucophyllum</i> | <i>L. frutescens</i>    | MN044638          |
