# Supplementary material for: Characterization and Comparative Analysis of Chloroplast Genomes of Medicinal Herb Scrophularia ningpoensis and Its Common Adulterants (Scrophulariaceae)
Source: Int J Mol Sci. 2023 Jun 12;24(12):10034. doi: 10.3390/ijms241210034 (PMC10298345; doi:10.3390/ijms241210034)
Supplement: Supplementary file 1 [file ijms-24-10034-s001.zip]

Archive with 9 entries (9 files):
- Supplementary Figure.pdf
- Table S1.xlsx
- Table S2.pdf
- Table S3.xlsx
- Table S4.xlsx
- Table S5.xlsx
- Table S6.xlsx
- Table S7.xlsx
- Table S8.pdf
