# Supplementary material for: Characterization and Comparative Analysis of Chloroplast Genomes of Medicinal Herb Scrophularia ningpoensis and Its Common Adulterants (Scrophulariaceae)
Source: Int J Mol Sci. 2023 Jun 12;24(12):10034. doi: 10.3390/ijms241210034 (PMC10298345; doi:10.3390/ijms241210034)
Supplement: Supplementary file 1 [file ijms-24-10034-s001.zip › Table S1.xlsx]

## Sheet: Sheet1
Supplementary Table S1: Morphological comparison among four Scrophularia species.
Characters		S. ningpoensis	S. buergeriana	S. kakudensis	S. yoshimurae
Calyx lobes		Calyx lobe apex obtuse to rounded	Calyx lobes obtuse to truncate or ± toothed at apex	Calyx lobe apex acute to acuminate	Calyx lobe apex acute to acuminate
Corolla		Corolla brown-purple, 8–9 mm	Corolla yellow-green, 5–6 mm	Corolla outside green, inside purplish brown, 7–8 mm	Corolla purplish, urceolate, 7–12 mm
Inflorescences		Thyrses to 50 cm, largely lax;cymes terminal and axillary, often 2–4-flowered, rarely a terminal cyme less than 10 cm	Thyrses spicate, to 50 cm, less than 2 cm wide; cymes all alternate or lower ones subopposite; peduncle less than 5 mm, sparsely glandular hairy	Thyrses to 30 cm; cymes terminal or axillary; peduncle and pedicels glandular hairy	Thyrses terminal, lax, large; cymes terminal and axillary, 2–9-flowered; peduncle glandular pilose.
Leaf blade	Blade shape	Leaf blade below mostly ovate, upper ones ovate-lanceolate to lanceolate, to 30 × 19 cm, base cuneate, rounded, or subcordate	Leaf blade ovate to elliptic-ovate, 5–12 cm, base broadly cuneate to truncate	Leaf blade ovate to narrowly ovate, 5–12 cm, abaxially glabrous or pubescent on veins, base rounded, subtruncate, or subcordate	Leaf blade ovate to ovate-lanceolate, glabrous, 5–14 × 2–5 cm, base truncate, rounded, or cuneate
	Serrate degree of leaf margin	Leaf margin serrulate and rarely irregularly double serrate	Leaf margin acutely serrate	Leaf margin regularly serrate	Leaf margin double serrate, apex acute to acuminate.
Distribution range and habitat		Bamboo forests, along streams, thickets, tall grasses; below 1700 m. Anhui, Fujian, Guangdong, Guizhou, N Hebei, Henan, Jiangsu, Jiangxi, S Shaanxi, Shanxi, Sichuan, Zhejiang.	Lower mountain slopes, wet grassland; 200–1100 m. Northern China (Hebei, Henan, Jilin, Liaoning, Shandong), Japan, Korea.	Scrub on mountain slopes. Liaoning Province (Dandong Shi, Xiuyan Xian) in China, Japan, Korea.	Edge of forests, trailsides, open stream banks; 600–2900 m. Taiwan.
