# Supplementary material for: Characterization and Comparative Analysis of Chloroplast Genomes of Medicinal Herb Scrophularia ningpoensis and Its Common Adulterants (Scrophulariaceae)
Source: Int J Mol Sci. 2023 Jun 12;24(12):10034. doi: 10.3390/ijms241210034 (PMC10298345; doi:10.3390/ijms241210034)
Supplement: Supplementary file 1 [file ijms-24-10034-s001.zip › Table S3.xlsx]

## Sheet: codon usage bias
Supplementary Table S3: Summary of average relative synonymous codon usage (RSCU) of the codon usage in the Scrophularia cp genomes.
		S.ningpoensis(OQ633009)		S.ningpoensis(MN734369)		S.ningpoensis(NC_053823)		S.buergeriana(OQ633013)		S.buergeriana(NC_031437)		S.buergeriana(KP718626)		S.kakudensis(OQ633011)		S.kakudensis(OQ633012)		S.kakudensis(MN255822)		S.yoshimurae(OQ633010)
AA	Codon	RSCU	Number	RSCU	Number	RSCU	Number	RSCU	Number	RSCU	Number	RSCU	Number	RSCU	Number	RSCU	Number	RSCU	Number	RSCU	Number
Phe	UUU(F)	1.18	2210	1.18	2210	1.18	2210	1.17	2093	1.2	2170	1.2	2170	1.19	2156	1.21	2151	1.19	2157	1.2	2164
	UUC(F)	0.82	1532	0.82	1532	0.82	1532	0.83	1494	0.8	1457	0.8	1457	0.81	1474	0.79	1398	0.81	1459	0.8	1432
Leu	UUA(L)	1.27	1090	1.27	1090	1.27	1090	1.26	1128	1.22	1012	1.22	1012	1.21	1006	1.27	1094	1.25	1076	1.17	1023
	UUG(L)	1.22	1048	1.22	1048	1.22	1048	1.26	1124	1.21	1001	1.21	1001	1.31	1090	1.2	1036	1.17	1014	1.24	1079
	CUU(L)	1.24	1068	1.24	1068	1.24	1068	1.18	1054	1.27	1054	1.27	1054	1.25	1038	1.27	1091	1.31	1133	1.24	1084
	CUC(L)	0.74	641	0.74	641	0.74	641	0.76	682	0.77	635	0.77	635	0.78	650	0.74	637	0.73	630	0.79	691
	CUA(L)	0.94	808	0.94	808	0.94	808	0.97	864	0.95	783	0.95	783	0.89	743	0.95	816	0.95	817	0.96	841
	CUG(L)	0.6	513	0.6	513	0.6	513	0.57	505	0.58	479	0.58	479	0.56	466	0.57	495	0.59	512	0.6	521
Ile	AUU(I)	1.22	1623	1.22	1623	1.22	1623	1.21	1690	1.27	1762	1.27	1762	1.26	1814	1.29	1716	1.25	1657	1.24	1762
	AUC(I)	0.78	1037	0.78	1037	0.78	1037	0.77	1074	0.79	1100	0.79	1100	0.77	1106	0.74	985	0.78	1030	0.77	1094
	AUA(I)	1	1332	1	1332	1	1332	1.02	1421	0.94	1315	0.94	1315	0.97	1387	0.97	1282	0.97	1284	1	1419
Met	AUG(M)	1	806	1	806	1	806	1	851	1	773	1	773	1	797	1	801	1	745	1	846
Val	GUU(V)	1.38	798	1.38	798	1.38	798	1.31	739	1.4	808	1.4	808	1.38	792	1.35	782	1.38	791	1.33	769
	GUC(V)	0.73	424	0.73	424	0.73	424	0.75	426	0.69	398	0.69	398	0.74	426	0.76	440	0.72	409	0.76	441
	GUA(V)	1.22	706	1.22	706	1.22	706	1.18	666	1.16	670	1.16	670	1.18	678	1.15	666	1.2	685	1.2	692
	GUG(V)	0.67	388	0.67	388	0.67	388	0.76	432	0.75	430	0.75	430	0.7	400	0.74	428	0.7	402	0.71	412
Ser	UCU(S)	1.48	1171	1.48	1171	1.48	1171	1.42	1146	1.44	1141	1.44	1141	1.48	1174	1.49	1178	1.42	1120	1.47	1149
	UCC(S)	1.16	918	1.16	918	1.16	918	1.17	945	1.11	876	1.11	876	1.09	866	1.1	867	1.13	886	1.13	885
	UCA(S)	1.2	946	1.2	946	1.2	946	1.27	1029	1.24	982	1.24	982	1.1	872	1.3	1031	1.25	979	1.14	892
	UCG(S)	0.79	624	0.79	624	0.79	624	0.74	602	0.78	618	0.78	618	0.79	624	0.73	576	0.77	606	0.75	586
Pro	CCU(P)	1.09	665	1.09	665	1.09	665	1.09	640	1.09	698	1.09	698	1.14	716	1.1	663	1.09	654	1.09	669
	CCC(P)	1	611	1	611	1	611	1	589	0.99	633	0.99	633	0.99	622	1.04	628	1.04	628	1.02	624
	CCA(P)	1.26	767	1.26	767	1.26	767	1.25	734	1.26	807	1.26	807	1.26	795	1.18	714	1.18	710	1.25	763
	CCG(P)	0.65	398	0.65	398	0.65	398	0.67	394	0.66	423	0.66	423	0.61	381	0.67	406	0.69	414	0.64	394
Thr	ACU(T)	1.12	609	1.12	609	1.12	609	1.12	617	1.16	654	1.16	654	1.27	736	1.1	607	1.02	551	1.14	607
	ACC(T)	0.97	528	0.97	528	0.97	528	1.06	585	1.05	592	1.05	592	0.97	562	1.02	559	1.11	596	1.02	546
	ACA(T)	1.26	688	1.26	688	1.26	688	1.18	650	1.14	641	1.14	641	1.15	670	1.18	648	1.17	631	1.2	637
	ACG(T)	0.66	359	0.66	359	0.66	359	0.63	346	0.66	371	0.66	371	0.61	354	0.7	386	0.7	374	0.64	342
Ala	GCU(A)	1.24	476	1.24	476	1.24	476	1.26	461	1.27	481	1.27	481	1.33	530	1.28	483	1.22	438	1.21	427
	GCC(A)	0.98	374	0.98	374	0.98	374	1.02	373	0.97	366	0.97	366	0.91	363	0.93	349	0.94	337	0.95	337
	GCA(A)	1.17	447	1.17	447	1.17	447	1.09	399	1.16	439	1.16	439	1.15	458	1.16	437	1.16	418	1.15	407
	GCG(A)	0.61	233	0.61	233	0.61	233	0.64	233	0.59	224	0.59	224	0.6	239	0.63	239	0.69	247	0.69	244
Tyr	UAU(Y)	1.33	1314	1.33	1314	1.33	1314	1.31	1268	1.35	1378	1.35	1378	1.35	1305	1.36	1414	1.33	1409	1.34	1314
	UAC(Y)	0.67	667	0.67	667	0.67	667	0.69	674	0.65	669	0.65	669	0.65	630	0.64	663	0.67	711	0.66	649
Stop codon	UAA(*)	1.15	1067	1.15	1067	1.15	1067	1.07	1065	1.15	1155	1.15	1155	1.16	1047	1.1	1089	1.18	1170	1.14	1160
	UAG(*)	0.85	786	0.85	786	0.85	786	0.85	845	0.85	861	0.85	861	0.81	733	0.85	839	0.82	809	0.81	825
His	CAU(H)	1.41	953	1.42	954	1.42	954	1.32	832	1.42	917	1.42	917	1.38	890	1.42	939	1.46	1045	1.36	912
	CAC(H)	0.59	394	0.58	394	0.58	394	0.68	428	0.58	372	0.58	372	0.62	403	0.58	388	0.54	383	0.64	429
Gln	CAA(Q)	1.35	1029	1.35	1029	1.35	1029	1.39	1041	1.37	1037	1.37	1037	1.37	982	1.36	1055	1.37	1093	1.36	1055
	CAG(Q)	0.65	498	0.65	498	0.65	498	0.61	456	0.63	474	0.63	474	0.63	450	0.64	500	0.63	497	0.64	498
Asn	AAU(N)	1.38	1721	1.38	1721	1.38	1721	1.38	1700	1.39	1676	1.39	1676	1.39	1729	1.39	1673	1.35	1652	1.35	1600
	AAC(N)	0.62	775	0.62	775	0.62	775	0.62	760	0.61	743	0.61	743	0.61	754	0.61	736	0.65	795	0.65	762
Lys	AAA(K)	1.32	2061	1.32	2061	1.32	2061	1.34	2025	1.33	2060	1.33	2060	1.36	2093	1.33	2017	1.31	1967	1.32	2015
	AAG(K)	0.68	1063	0.68	1063	0.68	1063	0.66	996	0.67	1043	0.67	1043	0.64	986	0.67	1026	0.69	1033	0.68	1034
Asp	GAU(D)	1.44	1131	1.44	1131	1.44	1131	1.43	1039	1.44	1119	1.44	1119	1.47	1137	1.46	1089	1.45	1126	1.41	1026
	GAC(D)	0.56	438	0.56	438	0.56	438	0.57	419	0.56	431	0.56	431	0.53	415	0.54	402	0.55	427	0.59	432
Glu	GAA(E)	1.34	1355	1.34	1355	1.34	1355	1.39	1329	1.35	1377	1.35	1377	1.39	1317	1.37	1381	1.36	1401	1.4	1334
	GAG(E)	0.66	665	0.66	665	0.66	665	0.61	582	0.65	662	0.65	662	0.61	580	0.63	638	0.64	661	0.6	576
Cys	UGU(C)	1.24	646	1.24	646	1.24	646	1.2	676	1.2	695	1.2	695	1.2	641	1.21	672	1.18	671	1.19	670
	UGC(C)	0.76	394	0.76	394	0.76	394	0.8	448	0.8	467	0.8	467	0.8	423	0.79	439	0.82	463	0.81	453
Stop codon	UGA(*)	1.01	936	1.01	936	1.01	936	1.07	1066	1	1008	1	1008	1.04	939	1.05	1036	1.01	998	1.05	1069
Trp	UGG(W)	1	710	1	710	1	710	1	706	1	703	1	703	1	687	1	735	1	686	1	704
Arg	CGU(R)	0.7	391	0.7	391	0.7	391	0.68	379	0.73	385	0.73	385	0.7	389	0.68	373	0.68	365	0.71	393
	CGC(R)	0.48	270	0.48	270	0.48	270	0.46	256	0.45	237	0.45	237	0.42	237	0.43	235	0.45	241	0.42	235
	CGA(R)	0.99	553	0.99	553	0.99	553	0.99	558	1.11	585	1.11	585	1.1	616	1.09	601	1.08	581	1.09	605
	CGG(R)	0.74	415	0.74	415	0.74	415	0.77	432	0.74	392	0.74	392	0.73	405	0.77	423	0.74	397	0.79	438
Ser	AGU(S)	0.8	632	0.8	632	0.8	632	0.8	645	0.84	666	0.84	666	0.91	722	0.82	649	0.84	658	0.85	665
	AGC(S)	0.56	441	0.56	441	0.56	441	0.6	483	0.59	464	0.59	464	0.64	505	0.56	440	0.59	467	0.66	519
Arg	AGA(R)	1.92	1071	1.92	1071	1.92	1071	2	1120	1.83	968	1.83	968	1.92	1073	1.97	1086	1.94	1042	1.95	1085
	AGG(R)	1.17	653	1.17	653	1.17	653	1.11	620	1.14	602	1.14	602	1.13	630	1.06	586	1.11	596	1.05	584
Gly	GGU(G)	1.04	567	1.04	567	1.04	567	0.96	531	0.98	557	0.98	557	0.99	573	0.99	571	1.02	578	0.96	536
	GGC(G)	0.61	334	0.61	334	0.61	334	0.61	336	0.64	361	0.64	361	0.61	349	0.62	358	0.67	383	0.66	370
	GGA(G)	1.37	752	1.37	752	1.37	752	1.42	784	1.45	823	1.45	823	1.42	821	1.43	824	1.35	764	1.41	789
	GGG(G)	0.98	537	0.98	537	0.98	537	1.02	564	0.93	530	0.93	530	0.98	562	0.95	544	0.96	546	0.97	539
Total			51057		51058		51058		51049		51210		51210		51008		51010		51005		51054

## Sheet: GC contents
S.ningpoensis(OQ633009)		S.ningpoensis(MN734369)		S.ningpoensis(NC_053823)		S.buergeriana(OQ633013)		S.buergeriana(NC_031437)		S.buergeriana(KP718626)		S.kakudensis(OQ633011)		S.kakudensis(OQ633012)		S.kakudensis(MN255822)		S.yoshimurae(OQ633010)
Nc = 55.83		Nc =55.83		Nc =55.83		Nc =55.92		Nc =55.90		Nc =55.90		Nc =55.55		Nc =55.62		Nc =55.98		Nc =56.13
Coding GC 37.99% 1st letter GC 38.39% 2nd letter GC 37.44% 3rd letter GC 38.14%		Coding GC 37.99% 1st letter GC 38.39% 2nd letter GC 37.44% 3rd letter GC 38.14%		Coding GC 37.99% 1st letter GC 38.39% 2nd letter GC 37.44% 3rd letter GC 38.14%		Coding GC 37.98% 1st letter GC 37.53% 2nd letter GC 37.90% 3rd letter GC 38.51%		Coding GC 37.99% 1st letter GC 38.25% 2nd letter GC 37.86% 3rd letter GC 37.86%		Coding GC 37.99% 1st letter GC 38.25% 2nd letter GC 37.86% 3rd letter GC 37.86%		Coding GC 37.98% 1st letter GC 38.08% 2nd letter GC 38.30% 3rd letter GC 37.58%		Coding GC 37.98% 1st letter GC 38.14% 2nd letter GC 37.92% 3rd letter GC 37.60%		Coding GC 37.98% 1st letter GC 38.65% 2nd letter GC 37.30% 3rd letter GC 38.00%		Coding GC 37.98% 1st letter GC 38.16% 2nd letter GC 37.54% 3rd letter GC 38.24%
