# Supplementary material for: Characterization and Comparative Analysis of Chloroplast Genomes of Medicinal Herb Scrophularia ningpoensis and Its Common Adulterants (Scrophulariaceae)
Source: Int J Mol Sci. 2023 Jun 12;24(12):10034. doi: 10.3390/ijms241210034 (PMC10298345; doi:10.3390/ijms241210034)
Supplement: Supplementary file 1 [file ijms-24-10034-s001.zip › Table S4.xlsx]

## Sheet: conceptual data
Supplementary Table S4: Repeat types and lengths of Scrophularia chloroplast genomes.
Species	Foward repeats	Palindromic repeats	Reverse repeats	Complimentary repeats	30-39 bp	40-49 bp	≥50bp
S.ningpoensis(OQ633009)	22	22	1		35	10
S.ningpoensis(MN734369)	23	21	1		35	10
S.ningpoensis(NC_053823)	22	22	1		35	10
S.buergeriana(OQ633013)	21	21	3	2	36	11
S.buergeriana(NC_031437)	24	23			30	10	7
S.buergeriana(KP718626)	24	23			30	10	7
S.kakudensis(OQ633011)	20	23	1		34	10
S.Kakudensis(OQ633012)	19	26			35	10
S.kakudensis (MN255822)	20	23	1		34	10
S.yoshimurae(OQ633010)	21	23	1		34	10	1

## Sheet: repeat
Supplementary Table S4: Analyses of repeat sequences in ten Scrophularia chloroplast genomes.
repeat type		S.ningpoensis(OQ633009)				S.ningpoensis(MN734369)				S.ningpoensis(NC_053823)				S.buergeriana(OQ633013)				S.buergeriana(NC_031437)				S.buergeriana(KP718626)				S.kakudensis(OQ633011)				S.Kakudensis(OQ633012)				S.kakudensis(MN255822)				S.yoshimurae(OQ633010)
		length	start position	start position		length	start position	start position		length	start position	start position		length	start position	start position		length	start position	start position		length	start position	start position		length	start position	start position		length	start position	start position		length	start position	start position		length	start position	start position
F	1	41	98492	119672	F	41	98492	119672	F	41	98492	119672	F	41	98494	119651	F	166	29881	30127	F	166	29881	30127	F	41	98365	119524	F	41	117595	138754	F	41	98360	119519	F	41	98509	119673	F
	2	34	91507	91525	F	42	44022	119671	F	42	44022	119671	F	42	44009	119650	F	142	108163	108305	F	142	108163	108305	F	42	43968	119523	F	41	43954	98375	F	42	43960	119518	F	42	44051	119672	F
	3	34	145869	145887	F	35	47465	47482	F	35	47465	47482	F	41	44010	98494	F	142	129638	129780	F	142	129638	129780	F	41	43969	98365	F	40	91373	91409	F	41	43961	98360	F	41	44052	98509	F
	4	32	8313	35829	F	41	44023	98492	F	41	44023	98492	F	40	91491	91527	F	41	98691	119995	F	41	98691	119995	F	40	91363	91399	F	40	145721	145757	F	40	91358	91394	F	40	91506	91542	F
	5	30	9875	36721	F	40	91489	91525	F	40	91489	91525	F	40	145836	145872	F	42	44281	119994	F	42	44281	119994	F	40	145711	145747	F	36	46749	46762	F	40	145706	145742	F	40	145861	145897	F
	6	30	38983	41207	F	40	145863	145899	F	40	145863	145899	F	36	91489	91507	F	41	44282	98691	F	41	44282	98691	F	36	91361	91379	F	36	91371	91389	F	36	91356	91374	F	36	91504	91522	F
	7	30	145856	145910	F	36	91487	91505	F	36	91487	91505	F	36	145860	145878	F	40	91688	91724	F	40	91688	91724	F	36	145735	145753	F	36	145745	145763	F	36	145730	145748	F	36	145885	145903	F
	8	30	145876	145912	F	36	145887	145905	F	36	145887	145905	F	34	91509	91527	F	40	146321	146357	F	40	146321	146357	F	34	91381	91399	F	34	91391	91409	F	34	91376	91394	F	34	91524	91542	F
	9	36	145887	145905	F	34	91507	91525	F	34	91507	91525	F	34	145842	145860	F	36	91686	91704	F	36	91686	91704	F	34	145717	145735	F	34	145727	145745	F	34	145712	145730	F	34	145867	145885	F
	10	30	44037	98506	F	34	145869	145887	F	34	145869	145887	F	30	37494	37521	F	36	146345	146363	F	36	146345	146363	F	30	43983	98379	F	30	43968	98389	F	30	43975	98374	F	30	37536	37563	F
	11	30	89075	89117	F	30	37507	37534	F	30	37507	37534	F	30	44024	98508	F	34	91706	91724	F	34	91706	91724	F	32	8299	35804	F	32	8284	35789	F	32	8302	35788	F	30	44066	98523	F
	12	30	91517	91535	F	30	44037	98506	F	30	44037	98506	F	32	8308	35819	F	34	146327	146345	F	34	146327	146345	F	30	9859	36696	F	30	9846	36681	F	30	9864	36679	F	32	8330	35861	F
	13	30	148281	148323	F	32	8313	35829	F	32	8313	35829	F	30	9870	36711	F	30	37766	37793	F	30	37766	37793	F	30	38928	41152	F	30	38913	41137	F	30	38911	41135	F	30	9898	36753	F
	14	30	37507	37534	F	30	9875	36721	F	30	9875	36721	F	30	38970	41194	F	30	44296	98705	F	30	44296	98705	F	30	43983	119538	F	30	88959	89001	F	30	43975	119533	F	30	39012	41236	F
	15	30	44037	119686	F	30	38983	41207	F	30	38983	41207	F	30	44024	119665	F	32	8328	36085	F	32	8328	36085	F	30	88949	88991	F	30	91372	91426	F	30	88944	88986	F	30	44066	119687	F
	16	42	44022	119671	F	30	44037	119686	F	30	44037	119686	F	30	89077	89119	F	30	9890	36977	F	30	9890	36977	F	30	91362	91416	F	30	91401	91419	F	30	91357	91411	F	30	89092	89134	F
	17	35	47465	47482	F	30	89075	89117	F	30	89075	89117	F	30	91490	91544	F	30	39242	41466	F	30	39242	41466	F	30	91391	91409	F	30	145714	145768	F	30	91386	91404	F	30	91505	91559	F
	18	41	44023	98492	F	30	91488	91542	F	30	91488	91542	F	30	91519	91537	F	30	44296	120009	F	30	44296	120009	F	30	145704	145758	F	30	145734	145770	F	30	145699	145753	F	30	91534	91552	F
	19	40	91489	91525	F	30	91517	91535	F	30	91517	91535	F	30	145829	145883	F	30	89274	89316	F	30	89274	89316	F	30	145724	145760	F	30	148139	148181	F	30	145719	145755	F	30	145854	145908	F
	20	30	91488	91542	F	30	145856	145910	F	30	145856	145910	F	30	145849	145885	F	30	91687	91741	F	30	91687	91741	F	30	148129	148171	F					30	148124	148166	F	30	145874	145910	F
	21	40	145863	145899	F	30	145876	145912	F	30	145876	145912	F	30	148254	148296	F	30	91716	91734	F	30	91716	91734	F													30	148279	148321	F
	22	36	91487	91505	F	30	148281	148323	F	30	148281	148323	F					30	146314	146368	F	30	146314	146368	F
	23																	30	146334	146370	F	30	146334	146370	F
	24																	30	148739	148781	F	30	148739	148781	F
P	25	41	119672	138895	P	41	119672	138895	P	41	119672	138895	P	41	119651	138868	P	142	108163	129638	P	142	108163	129638	P	41	119524	138744	P	41	98375	117595	P	41	119519	138739	P	58	46868	46868	P
	26	36	91487	145887	P	44	74607	74607	P	44	74607	74607	P	38	46847	46847	P	142	108305	129780	P	142	108305	129780	P	44	74483	74483	P	44	74495	74495	P	44	74480	74480	P	41	119673	138893	P
	27	36	91505	145905	P	41	44023	138895	P	41	44023	138895	P	44	74611	74611	P	102	29921	30047	P	102	29921	30047	P	41	43969	138744	P	42	43953	117595	P	41	43961	138739	P	44	74632	74632	P
	28	30	44037	138892	P	40	91489	145863	P	40	91489	145863	P	41	44010	138868	P	102	30047	30167	P	102	30047	30167	P	38	112744	112744	P	41	43954	138754	P	38	112739	112739	P	41	44052	138893	P
	29	31	46835	46835	P	40	91525	145899	P	40	91525	145899	P	40	91491	145836	P	41	119995	139353	P	41	119995	139353	P	40	91363	145711	P	38	124378	124378	P	40	91358	145706	P	40	91506	145861	P
	30	30	35831	45711	P	30	8315	45711	P	30	8315	45711	P	40	91527	145872	P	44	74812	74812	P	44	74812	74812	P	40	91399	145747	P	40	91373	145721	P	40	91394	145742	P	40	91542	145897	P
	31	30	89075	148281	P	34	75437	75437	P	34	75437	75437	P	30	8310	45698	P	41	44282	139353	P	41	44282	139353	P	30	8301	45656	P	40	91409	145757	P	30	8304	45649	P	30	8332	45741	P
	32	30	91517	145863	P	36	91487	145887	P	36	91487	145887	P	34	75441	75441	P	40	91688	146321	P	40	91688	146321	P	36	91361	145735	P	30	8286	45642	P	36	91356	145730	P	36	91504	145885	P
	33	30	91535	145881	P	36	91505	145905	P	36	91505	145905	P	36	91489	145860	P	40	91724	146357	P	40	91724	146357	P	36	91379	145753	P	36	91371	145745	P	36	91374	145748	P	36	91522	145903	P
	34	30	91542	145910	P	32	46850	46850	P	32	46850	46850	P	36	91507	145878	P	30	8330	45970	P	30	8330	45970	P	32	46781	46781	P	36	91389	145763	P	32	46769	46769	P	32	75462	75462	P
	35	44	74607	74607	P	34	91507	145869	P	34	91507	145869	P	34	91509	145842	P	36	91686	146345	P	36	91686	146345	P	32	75313	75313	P	32	75325	75325	P	32	75310	75310	P	34	91524	145867	P
	36	30	8315	45711	P	34	91525	145887	P	34	91525	145887	P	34	91527	145860	P	36	91704	146363	P	36	91704	146363	P	34	91381	145717	P	34	91391	145727	P	34	91376	145712	P	34	91542	145885	P
	37	34	91507	145869	P	30	44037	138892	P	30	44037	138892	P	30	44024	138865	P	32	75642	75642	P	32	75642	75642	P	34	91399	145735	P	34	91409	145745	P	34	91394	145730	P	30	44066	138890	P
	38	34	91525	145887	P	30	46850	46850	P	30	46850	46850	P	30	123129	123129	P	34	91706	146327	P	34	91706	146327	P	30	43983	138741	P	31	46752	46765	P	30	43975	138736	P	30	46881	46881	P
	39	30	46850	46850	P	31	46835	46835	P	31	46835	46835	P	30	35821	45698	P	34	91724	146345	P	34	91724	146345	P	30	46781	46781	P	30	43968	138751	P	30	46769	46769	P	31	46866	46866	P
	40	30	89117	148323	P	30	35831	45711	P	30	35831	45711	P	30	89077	148254	P	30	44296	139350	P	30	44296	139350	P	31	46766	46766	P	31	44587	46598	P	31	46754	46754	P	31	46898	46898	P
	41	30	91488	145856	P	30	89075	148281	P	30	89075	148281	P	30	89119	148296	P	30	36087	45970	P	30	36087	45970	P	30	35806	45656	P	31	46752	46752	P	30	35790	45649	P	30	35863	45741	P
	42	41	44023	138895	P	30	89117	148323	P	30	89117	148323	P	30	91490	145829	P	30	89274	148739	P	30	89274	148739	P	30	88949	148129	P	31	46765	46765	P	30	88944	148124	P	30	89092	148279	P
	43	40	91489	145863	P	30	91488	145856	P	30	91488	145856	P	30	91519	145836	P	30	89316	148781	P	30	89316	148781	P	30	88991	148171	P	30	35791	45642	P	30	88986	148166	P	30	89134	148321	P
	44	40	91525	145899	P	30	91517	145863	P	30	91517	145863	P	30	91537	145854	P	30	91687	146314	P	30	91687	146314	P	30	91362	145704	P	30	43968	117592	P	30	91357	145699	P	30	91505	145854	P
	45	32	46850	46850	P	30	91535	145881	P	30	91535	145881	P	30	91544	145883	P	30	91716	146321	P	30	91716	146321	P	30	91391	145711	P	30	88959	148139	P	30	91386	145706	P	30	91534	145861	P
	46	34	75437	75437	P	30	91542	145910	P	30	91542	145910	P					30	91734	146339	P	30	91734	146339	P	30	91409	145729	P	30	89001	148181	P	30	91404	145724	P	30	91552	145879	P
	47																	30	91741	146368	P	30	91741	146368	P	30	91416	145758	P	30	91372	145714	P	30	91411	145753	P	30	91559	145908	P
	48																													30	91401	145721	P
	49																													30	91419	145739	P
	50																													30	91426	145768	P
R	51	33	46850	46850	R	33	46850	46850	R	33	46850	46850	R	39	46847	46847	R									33	46781	46781	R					33	46769	46769	R	31	46882	46882	R
	52													37	46847	46847	R
	53													31	46825	46825	R
C	54													41	46847	46848	C
	55													30	46834	46835	C
