# Supplementary material for: Characterization and Comparative Analysis of Chloroplast Genomes of Medicinal Herb Scrophularia ningpoensis and Its Common Adulterants (Scrophulariaceae)
Source: Int J Mol Sci. 2023 Jun 12;24(12):10034. doi: 10.3390/ijms241210034 (PMC10298345; doi:10.3390/ijms241210034)
Supplement: Supplementary file 1 [file ijms-24-10034-s001.zip › Table S5.xlsx]

## Sheet: conceptual data
Supplementary Table S5: Frequency of identified SSR motifs
Repeats	3	4	5	6	7	8	9	10	11	12	13	14	15	total
A	-	-	-	-	-	-	-	65	38	24	5		7	139
T	-	-	-	-	-	-	-	106	54	20	13	4	3	200
AT	-	-	-	10										10
TA	-	-	-	9	8	5	2	2	1					27
ATA	-	10												10
AATA	9													9
ATCA	3													3
GAAA	10													10
GTCT	10													10
TATT	1													1
TTTTA	3													3
Frequency of classified repeat types (considering sequence complementary)
Repeats	3	4	5	6	7	8	9	10	11	12	13	14	15	total
A/T	-	-	-	-	-	-	-	171	92	44	18	4	10	339
AT/AT	-	-	-	19	8	5	2	2	1					37
AAT/ATT	-	10												10
AAAG/CTTT	10													10
AAAT/ATTT	10													10
AATC/ATTG	3													3
ACAG/CTGT	10													10
AAAAT/ATTTT	3													3

## Sheet: unsorted
S.ningpoensis(OQ633009)					S.ningpoensis(MN734369)					S.ningpoensis(NC_053823)					S.buergeriana(OQ633013)					S.buergeriana(NC_031437)					S.buergeriana(KP718626)					S.kakudensis( OQ633011)					S.kakudensis(OQ633012)					S.kakudensis(MN255822)					S.yoshimurae(OQ633010)
type	size	start	end	location	type	size	start	end	location	type	size	start	end	location	type	size	start	end	location	type	size	start	end	location	type	size	start	end	location	type	size	start	end	location	type	size	start	end	location	type	size	start	end	location	type	size	start	end	location
(TA)6	12	8472	8483	IGS	(TA)6	12	8472	8483	IGS	(TA)6	12	8472	8483	IGS	(TA)6	12	8467	8478	IGS	(TA)6	12	8487	8498	IGS	(TA)6	12	8487	8498	IGS	(T)11	11	8899	8909	IGS	(TA)6	12	8443	8454	IGS	(TA)6	12	8461	8472	IGS	(TA)6	12	8489	8500	IGS
(T)10	10	8914	8923	IGS	(T)10	10	8914	8923	IGS	(T)10	10	8914	8923	IGS	(T)10ccgaactcaaataaaaaagaaactatcgattctgcccacaatgcatttttctgttatgattttagtc(T)10	87	8833	8919	IGS	(T)10ccgaactcaaataaaaaagaaactatcgattctgcccacaatgcatttttctgttatgattttagtc(T)10	87	8853	8939	IGS	(T)10ccgaactcaaataaaaaagaaactatcgattctgcccacaatgcatttttctgttatgattttagtc(T)10	87	8853	8939	IGS	(GTCT)3	12	11264	11275	CDS	(T)11	11	8886	8896	IGS	(T)11	11	8904	8914	IGS	(T)10	10	8855	8864	IGS
(T)10	10	9465	9474	tRNA intron	(T)10	10	9465	9474	tRNA intron	(T)10	10	9465	9474	tRNA intron	(GTCT)3	12	11275	11286	CDS	(GTCT)3	12	11295	11306	CDS	(GTCT)3	12	11295	11306	CDS	(A)10	10	12430	12439	CDS intron	(GTCT)3	12	11251	11262	CDS	(GTCT)3	12	11252	11263	CDS	(T)10	10	9482	9491	tRNA intron
(GTCT)3	12	11280	11291	CDS	(GTCT)3	12	11280	11291	CDS	(GTCT)3	12	11280	11291	CDS	(T)11	11	13209	13219	IGS	(T)11	11	13229	13239	IGS	(T)11	11	13229	13239	IGS	(T)14	14	13200	13213	IGS	(T)12	12	13185	13196	IGS	(T)13	13	13186	13198	IGS	(GTCT)3	12	11302	11313	CDS
(A)11	11	12445	12455	CDS intron	(A)11	11	12445	12455	CDS intron	(A)11	11	12445	12455	CDS intron	(T)13	13	14589	14601	IGS	(T)13	13	14609	14621	IGS	(T)13	13	14609	14621	IGS	(T)14	14	14578	14591	IGS	(T)14	14	14561	14574	IGS	(T)14	14	14564	14577	IGS	(T)11	11	13236	13246	IGS
(T)13	13	14598	14610	IGS	(T)13	13	14598	14610	IGS	(T)13	13	14598	14610	IGS	(T)11	11	18612	18622	CDS	(T)11	11	18632	18642	CDS	(T)11	11	18632	18642	CDS	(T)11	11	18605	18615	CDS	(T)11	11	18589	18599	CDS	(T)11	11	18592	18602	CDS	(T)12	12	14616	14627	IGS
(T)11	11	18622	18632	CDS	(T)11	11	18622	18632	CDS	(T)11	11	18622	18632	CDS	(AT)6	12	42778	42789	IGS	(AT)6	12	43050	43061	IGS	(AT)6	12	43050	43061	IGS	(AT)6	12	42736	42747	IGS	(A)10	10	30500	30509	IGS	(AT)6	12	42728	42739	IGS	(T)11	11	18638	18648	CDS
(AT)6	12	42791	42802	IGS	(AT)6	12	42791	42802	IGS	(AT)6	12	42791	42802	IGS	(A)12	12	44654	44665	CDS intron	(A)12	12	44926	44937	CDS intron	(A)12	12	44926	44937	CDS intron	(A)11	11	44613	44623	CDS intron	(AT)6	12	42721	42732	IGS	(A)10	10	44605	44614	CDS intron	(AT)6	12	42820	42831	IGS
(A)12	12	44667	44678	CDS intron	(A)12	12	44667	44678	CDS intron	(A)12	12	44667	44678	CDS intron	(T)11	11	46666	46676	IGS	(T)11	11	46938	46948	IGS	(T)11	11	46938	46948	IGS	(A)10	10	44867	44876	IGS	(A)10	10	44598	44607	CDS intron	(A)12	12	44858	44869	IGS	(A)13	13	44696	44708	CDS intron
(T)10	10	46679	46688	IGS	(T)10	10	46679	46688	IGS	(T)10	10	46679	46688	IGS	(TA)9at(TA)11	42	46848	46889	IGS	(TA)8	16	47123	47138	IGS	(TA)8	16	47123	47138	IGS	(T)9~(TTTTA)2	21	46624	46644	IGS	(A)11	11	44852	44862	IGS	(TTTTA)3	15	46618	46632	IGS	(T)11	11	46709	46719	IGS
(TA)7attt(TA)8	34	46851	46884	IGS	(TA)7attt(TA)8	34	46851	46884	IGS	(TA)7attt(TA)8	34	46851	46884	IGS	(A)10	10	47560	47569	IGS	(A)11	11	47784	47794	IGS	(A)11	11	47784	47794	IGS	(TA)7attt(TA)10	38	46782	46819	IGS	(T)9~(TTTTA)2	21	46610	46630	IGS	(TA)7attt(TA)10	38	46770	46807	IGS	(TA)7attt(TA)7	32	46882	46913	IGS
(A)10	10	47565	47574	IGS	(A)10	10	47565	47574	IGS	(A)10	10	47565	47574	IGS	(T)12	12	51354	51365	IGS	(T)12	12	51579	51590	IGS	(T)12	12	51579	51590	IGS	(T)10	10	51248	51257	IGS	(TA)7atttatatatataattttt(TA)9	51	46768	46818	IGS	(T)10	10	51244	51253	IGS	(A)10	10	47599	47608	IGS
(T)13	13	51359	51371	IGS	(T)13	13	51359	51371	IGS	(T)13	13	51359	51371	IGS	(T)10caagcgtggaaaccccagaaccagaagtattaggattaattctc(ATA)4	66	55233	55298	CDS	(T)10caagcgtggaaaccccagaaccagaagtattaggattaattctc(ATA)4	66	55437	55502	CDS/IGS	(T)10caagcgtggaaaccccagaaccagaagtattaggattaattctc(ATA)4	66	55437	55502	CDS/IGS	(T)10caagcgtggaaaccccagaaccagaagtattaggattaattctc(ATA)4	66	55104	55169	CDS/IGS	(T)10	10	51255	51264	IGS	(T)10caagcgtggaaaccccagaaccagaagtattaggattaattctc(ATA)4	66	55100	55165	CDS/IGS	(T)12	12	51393	51404	IGS
(T)10	10	52357	52366	tRNA intron	(T)10	10	52357	52366	tRNA intron	(T)10	10	52357	52366	tRNA intron	(T)11	11	57893	57903	IGS	(T)10	10	58097	58106	IGS	(T)10	10	58097	58106	IGS	(T)10	10	57775	57784	IGS	(T)10caagcgtggaaaccccagaaccagaagtattaggattaattctc(ATA)4	66	55111	55176	CDS/IGS	(T)11	11	57771	57781	IGS	(T)10caagcgtggaaaccccagaaccagaagtattaggattaattctc(ATA)4	66	55251	55316	CDS/IGS
(T)10caagcgtggaaaccccagaaccagaagtattaggattaattctc(ATA)4	66	55219	55284	CDS/IGS	(T)10caagcgtggaaaccccagaaccagaagtattaggattaattctc(ATA)4	66	55219	55284	CDS/IGS	(T)10caagcgtggaaaccccagaaccagaagtattaggattaattctc(ATA)4	66	55219	55284	CDS/IGS	(T)11	11	60437	60447	IGS	(T)10	10	60640	60649	IGS	(T)10	10	60640	60649	IGS	(T)11	11	60318	60328	IGS	(T)11	11	57782	57792	IGS	(T)11	11	60315	60325	IGS	(T)10	10	60453	60462	IGS
(T)10	10	57879	57888	IGS	(T)10	10	57879	57888	IGS	(T)10	10	57879	57888	IGS	(GAAA)3	12	61663	61674	IGS	(GAAA)3	12	61865	61876	IGS	(GAAA)3	12	61865	61876	IGS	(GAAA)3	12	61544	61555	IGS	(T)11	11	60326	60336	IGS	(GAAA)3	12	61542	61553	IGS	(GAAA)3	12	61678	61689	IGS
(ATCA)3	12	59807	59818	IGS	(ATCA)3	12	59807	59818	IGS	(ATCA)3	12	59807	59818	IGS	(A)12	12	63658	63669	IGS	(A)12	12	63860	63871	IGS	(A)12	12	63860	63871	IGS	(A)12	12	63538	63549	IGS	(GAAA)3	12	61553	61564	IGS	(A)12	12	63536	63547	IGS	(A)12	12	63673	63684	IGS
(T)10	10	60430	60439	IGS	(T)10	10	60430	60439	IGS	(T)10	10	60430	60439	IGS	(A)10	10	68776	68785	IGS	(A)10	10	68978	68987	IGS	(A)10	10	68978	68987	IGS	(A)11	11	67293	67303	IGS	(A)12	12	63547	63558	IGS	(A)10	10	67292	67301	IGS	(A)10	10	68792	68801	IGS
(GAAA)3	12	61655	61666	IGS	(GAAA)3	12	61655	61666	IGS	(GAAA)3	12	61655	61666	IGS	(T)11aggtattttactgctaaatatggaagaaattctaatttttcttttgttaggtgtcaaaaatatagtcaataag(A)11	95	69437	69531	IGS	(T)11aggtattttactgctaaatatggaagaaattctaatttttcttttgttaggtgtcaaaaatatagtcaataag(A)10	94	69639	69732	IGS	(T)11aggtattttactgctaaatatggaagaaattctaatttttcttttgttaggtgtcaaaaatatagtcaataag(A)10	94	69639	69732	IGS	(A)11	11	69407	69417	IGS	(A)10	10	67308	67317	IGS	(A)10	10	68663	68672	IGS	(T)11aggtattttactgctaaatatggaagaaattctaatttttcttttgttaggtgtcaaaaatatagtcaataag(A)15	99	69453	69551	IGS
(A)11	11	63650	63660	IGS	(A)11	11	63650	63660	IGS	(A)11	11	63650	63660	IGS	(A)11gaaaaatctttc(T)12	35	75442	75476	CDS intron	(A)10gaaaaatctttc(T)12	34	75643	75676	CDS intron	(A)10gaaaaatctttc(T)12	34	75643	75676	CDS intron	(A)10gaaaaatctttc(T)12	34	75314	75347	CDS intron	(A)10gaaaaatctttc(T)12	34	75326	75359	CDS intron	(A)10	10	69405	69414	IGS	(A)10gaaaaatctttc(T)12	34	75463	75496	CDS intron
(A)10	10	68776	68785	IGS	(A)10	10	68776	68785	IGS	(A)10	10	68776	68785	IGS	(A)10	10	78154	78163	CDS intron	(A)10	10	78354	78363	CDS intron	(A)10	10	78354	78363	CDS intron	(A)11	11	78025	78035	CDS intron	(A)10	10	78037	78046	CDS intron	(A)10gaaaaatctttc(T)12	34	75311	75344	CDS intron	(T)10	10	78419	78428	CDS
(T)10aggtattttactgctaaatatggaagaaattctaatttttcttttgttaggtgtcaaaaatatagtcaataag(A)15	98	69437	69534	IGS	(T)10aggtattttactgctaaatatggaagaaattctaatttttcttttgttaggtgtcaaaaatatagtcaataag(A)15	98	69437	69534	IGS	(T)10aggtattttactgctaaatatggaagaaattctaatttttcttttgttaggtgtcaaaaatatagtcaataag(A)15	98	69437	69534	IGS	(T)10	10	78400	78409	CDS	(T)10	10	78600	78609	CDS	(T)10	10	78600	78609	CDS	(T)10	10	78272	78281	CDS	(T)10	10	78283	78292	CDS	(A)10	10	78022	78031	CDS intron	(T)11	11	80319	80329	CDS intron
(A)11gaaaaatctttc(T)13	36	75438	75473	CDS intron	(A)11gaaaaatctttc(T)13	36	75438	75473	CDS intron	(A)11gaaaaatctttc(T)13	36	75438	75473	CDS intron	(T)11	11	80301	80311	CDS intron	(T)11	11	80500	80510	CDS intron	(T)11	11	80500	80510	CDS intron	(T)11	11	80172	80182	CDS intron	(T)11	11	80183	80193	CDS intron	(T)10	10	78268	78277	CDS	(A)10	10	82031	82040	CDS intron
(A)11	11	78151	78161	CDS intron	(A)11	11	78151	78161	CDS intron	(A)11	11	78151	78161	CDS intron	(T)10	10	80815	80824	CDS intron	(T)10	10	81014	81023	CDS intron	(T)10	10	81014	81023	CDS intron	(T)11	11	80686	80696	CDS intron	(T)12	12	80697	80708	CDS intron	(T)11	11	80168	80178	CDS intron	(A)11	11	82536	82546	CDS intron
(T)10	10	78398	78407	CDS	(T)10	10	78398	78407	CDS	(T)10	10	78398	78407	CDS	(A)13	13	82014	82026	CDS intron	(A)12	12	82213	82224	CDS intron	(A)12	12	82213	82224	CDS intron	(A)12	12	81886	81897	CDS intron	(A)11	11	81898	81908	CDS intron	(T)10	10	80682	80691	CDS intron	(T)11	11	84336	84346	CDS intron
(T)11	11	80298	80308	CDS intron	(T)11	11	80298	80308	CDS intron	(T)11	11	80298	80308	CDS intron	(A)11	11	82522	82532	CDS intron	(A)10	10	82720	82729	CDS intron	(A)10	10	82720	82729	CDS intron	(A)10	10	82393	82402	CDS intron	(T)12	12	84202	84213	CDS intron	(A)12	12	81881	81892	CDS intron	(T)11	11	98896	98906	CDS intron
(T)10	10	80812	80821	CDS intron	(T)10	10	80812	80821	CDS intron	(T)10	10	80812	80821	CDS intron	(T)11	11	84321	84331	CDS intron	(T)11	11	84518	84528	CDS intron	(T)11	11	84518	84528	CDS intron	(T)12	12	84192	84203	CDS intron	(T)11	11	98767	98777	CDS intron	(A)10	10	82388	82397	CDS intron	(T)10	10	102664	102673	tRNA intron
(A)13	13	82011	82023	CDS intron	(A)13	13	82011	82023	CDS intron	(A)13	13	82011	82023	CDS intron	(T)12	12	98881	98892	CDS intron	(T)12	12	99078	99089	CDS intron	(T)12	12	99078	99089	CDS intron	(T)11	11	98757	98767	CDS intron	(T)10	10	102529	102538	tRNA intron	(T)12	12	84187	84198	CDS intron	(AATA)3	12	115203	115214	CDS
(A)11	11	82519	82529	CDS intron	(A)11	11	82519	82529	CDS intron	(A)11	11	82519	82529	CDS intron	(T)10	10	102644	102653	tRNA intron	(T)10	10	102841	102850	tRNA intron	(T)10	10	102841	102850	tRNA intron	(T)10	10	102519	102528	tRNA intron	(A)10	10	111788	111797	CDS	(T)11	11	98752	98762	CDS intron	(A)10	10	116585	116594	CDS intron
(T)11	11	84319	84329	IGS	(T)11	11	84319	84329	IGS	(T)11	11	84319	84329	IGS	(AATA)3	12	115182	115193	CDS	(AATA)3	12	115525	115536	CDS	(AATA)3	12	115525	115536	CDS	(AATA)3	12	115072	115083	CDS	(A)10	10	112062	112071	CDS intron	(T)10	10	102514	102523	CDS intron	(T)10	10	124085	124094	CDS
(T)15	15	98879	98893	CDS intron	(T)15	15	98879	98893	CDS intron	(T)15	15	98879	98893	CDS intron	(A)10	10	120029	120038	CDS intron	(A)10	10	116907	116916	CDS intron	(A)10	10	116907	116916	CDS intron	(A)10	10	116454	116463	CDS intron	(A)10	10	113215	113224	CDS intron	(AATA)3	12	115067	115078	CDS	(T)10	10	125238	125247	CDS
(T)10	10	102650	102659	tRNA intron	(T)10	10	102650	102659	tRNA intron	(T)10	10	102650	102659	tRNA intron	(T)10	10	124065	124074	CDS	(A)10	10	120373	120382	CDS intron	(A)10	10	120373	120382	CDS intron	(A)10	10	119902	119911	CDS intron	(T)10	10	117250	117259	CDS	(A)10	10	116449	116458	CDS intron	(T)10	10	125512	125521	CDS
(AATA)3	12	115202	115213	CDS	(AATA)3	12	115202	115213	CDS	(AATA)3	12	115202	115213	CDS	(T)10	10	125218	125227	CDS	(T)10	10	124408	124417	CDS	(T)10	10	124408	124417	CDS	(T)10	10	123937	123946	CDS	(T)10	10	120698	120707	CDS intron	(A)10	10	119897	119906	CDS intron	(A)10	10	134771	134780	tRNA intron
(A)10	10	116584	116593	IGS	(A)10	10	116584	116593	IGS	(A)10	10	116584	116593	IGS	(T)10	10	125492	125501	CDS	(T)10	10	125561	125570	CDS	(T)10	10	125561	125570	CDS	(T)10	10	125090	125099	CDS	(TATT)3	12	122078	122089	CDS	(T)10	10	123932	123941	CDS	(A)11	11	138538	138548	CDS intron
(T)10	10	124084	124093	CDS	(T)10	10	124084	124093	CDS	(T)10	10	124084	124093	CDS	(A)10	10	134751	134760	tRNA intron	(T)10	10	125835	125844	CDS	(T)10	10	125835	125844	CDS	(T)10	10	125364	125373	CDS	(A)10	10	134633	134642	tRNA intron	(T)10	10	125085	125094	CDS	(A)11	11	153098	153108	IGS
(T)10	10	125237	125246	CDS	(T)10	10	125237	125246	CDS	(T)10	10	125237	125246	CDS	(A)12	12	138512	138523	CDS intron	(A)10	10	135236	135245	tRNA intron	(A)10	10	135236	135245	tRNA intron	(A)10	10	134623	134632	tRNA intron	(A)11	11	138394	138404	CDS intron	(T)10	10	125359	125368	CDS
(T)10	10	125511	125520	CDS	(T)10	10	125511	125520	CDS	(T)10	10	125511	125520	CDS	(A)11	11	153073	153083	IGS	(A)12	12	138997	139008	CDS intron	(A)12	12	138997	139008	CDS intron	(A)11	11	138384	138394	CDS intron	(A)12	12	152958	152969	IGS	(A)10	10	134618	134627	CDS intron
(A)10	10	134770	134779	tRNA intron	(A)10	10	134770	134779	tRNA intron	(A)10	10	134770	134779	tRNA intron						(A)11	11	153558	153568	IGS	(A)11	11	153558	153568	IGS	(A)12	12	152948	152959	IGS						(A)11	11	138379	138389	CDS intron
(A)15	15	138536	138550	CDS intron	(A)15	15	138536	138550	CDS intron	(A)15	15	138536	138550	CDS intron																										(A)12	12	152943	152954	IGS
(A)11	11	153100	153110	IGS	(A)11	11	153100	153110	IGS	(A)11	11	153100	153110	IGS

## Sheet: polynucleotide
Table S4: Simple sequence repeat (SSR) polymorphism in ten Scrophularia chloroplast genomes.
	S.ningpoensis(OQ633009)				S.ningpoensis(MN734369)				S.ningpoensis(NC_053823)				S.buergeriana(OQ633013)				S.buergeriana(NC_031437)				S.buergeriana(KP718626)				S.kakudensis(OQ633011)				S.kakudensis(OQ633012)				S.kakudensis(MN255822)				S.yoshimurae( OQ633010)
	type	size	start	end	type	size	start	end	type	size	start	end	type	size	start	end	type	size	start	end	type	size	start	end	type	size	start	end	type	size	start	end	type	size	start	end	type	size	start	end
AT	(AT)6	12	42791	42802	(AT)6	12	42791	42802	(AT)6	12	42791	42802	(AT)6	12	42778	42789	(AT)6	12	43050	43061	(AT)6	12	43050	43061	(AT)6	12	42736	42747	(AT)6	12	42721	42732	(AT)6	12	42728	42739	(AT)6	12	42820	42831
TA	(TA)6	12	8472	8483	(TA)6	12	8472	8483	(TA)6	12	8472	8483	(TA)6	12	8467	8478	(TA)6	12	8487	8498	(TA)6	12	8487	8498					(TA)6	12	8443	8454	(TA)6	12	8461	8472	(TA)6	12	8489	8500
	(TA)7	14	46851	46864	(TA)7	14	46851	46864	(TA)7	14	46851	46864													(TA)7	14	46782	46795	(TA)7	14	46768	46781	(TA)7	14	46770	46783	(TA)7	14	46882	46895
																																					(TA)7	14	46900	46913
	(TA)8	16	46869	46884	(TA)8	16	46869	46884	(TA)8	16	46869	46884					(TA)8	16	47123	47138	(TA)8	16	47123	47138
													(TA)9	18	46848	46865													(TA)9	18	46801	46818
																									(TA)10	20	46800	46819					(TA)10	20	46788	46807
													(TA)11	22	46868	46889
ATA	(ATA)4	12	55273	55284	(ATA)4	12	55273	55284	(ATA)4	12	55273	55284	(ATA)4	12	55287	55298	(ATA)4	12	55491	55502	(ATA)4	12	55491	55502	(ATA)4	12	55158	55169	(ATA)4	12	55165	55176	(ATA)4	12	55154	55165	(ATA)4	12	55305	55316
AATA	(AATA)3	12	115202	115213	(AATA)3	12	115202	115213	(AATA)3	12	115202	115213	(AATA)3	12	115182	115193	(AATA)3	12	115525	115536	(AATA)3	12	115525	115536	(AATA)3	12	115072	115083					(AATA)3	12	115067	115078	(AATA)3	12	115203	115214
ATCA	(ATCA)3	12	59807	59818	(ATCA)3	12	59807	59818	(ATCA)3	12	59807	59818
GAAA	(GAAA)3	12	61655	61666	(GAAA)3	12	61655	61666	(GAAA)3	12	61655	61666	(GAAA)3	12	61663	61674	(GAAA)3	12	61865	61876	(GAAA)3	12	61865	61876	(GAAA)3	12	61544	61555	(GAAA)3	12	61553	61564	(GAAA)3	12	61542	61553	(GAAA)3	12	61678	61689
GTCT	(GTCT)3	12	11280	11291	(GTCT)3	12	11280	11291	(GTCT)3	12	11280	11291	(GTCT)3	12	11275	11286	(GTCT)3	12	11295	11306	(GTCT)3	12	11295	11306	(GTCT)3	12	11264	11275	(GTCT)3	12	11251	11262	(GTCT)3	12	11252	11263	(GTCT)3	12	11302	11313
TATT																													(TATT)3	12	122078	122089
TTTTA																									(TTTTA)2	10	46635	46644	(TTTTA)2	10	46621	46630	(TTTTA)3	15	46618	46632
