# Supplementary material for: Characterization and Comparative Analysis of Chloroplast Genomes of Medicinal Herb Scrophularia ningpoensis and Its Common Adulterants (Scrophulariaceae)
Source: Int J Mol Sci. 2023 Jun 12;24(12):10034. doi: 10.3390/ijms241210034 (PMC10298345; doi:10.3390/ijms241210034)
Supplement: Supplementary file 1 [file ijms-24-10034-s001.zip › Table S6.xlsx]

## Sheet: Sheet1
Supplementary Table S6: The Ka/Ks of the 80 protein coding genes of the ten Scrophularia individuals
Name	S.ningpoensis(OQ633009)	S.ningpoensis(MN734369)	S.ningpoensis(NC_053823)	S.buergeriana(OQ633013)	S.buergeriana(KP718626)	S.buergeriana(NC_031437)	S.kakudensis(OQ633011)	S.kakudensis(OQ633012)	S.kakudensis(MN255822)	S.yoshimurae(OQ633010)
psbA CDS	0	0	0	0	0	0	0	0	0	0
matK CDS	0.235274	0.235274	0.235274	0.293892	0.235274	0.235274	0.235127	0.195558	0.235127	0.235274
rps16 CDS	0	0	0	0	0	0	0	0	0	0
psbK CDS	0	0	0	0	0	0	0	0	0	0
psbI CDS	0	0	0	0	0	0	0	0	0	0
atpA CDS	0.649033	0.649033	0.649033	0.323934	0.323934	0.323934	0.648263	0.648263	0.648263	0.323934
atpF CDS	0	0	0	0	0	0	0	0	0	0
atpH CDS	0	0	0	0	0	0	0	0	0	0
atpI CDS	0.3228	0.3228	0.3228	0.3228	0.3228	0.3228	0.3228	0.3228	0.3228	0.3228
rps2 CDS	0	0	0	0	0	0	0	0	0	0
rpoC2 CDS	0.113308	0.113308	0.113308	0.129585	0.172894	0.172894	0.252478	0.252307	0.172855	0.129473
rpoC1 CDS	0.308235	0.308235	0.308235	0.616734	0.617578	0.617578	0.616734	0.616734	0.617578	0.153903
rpoB CDS	0.308482	0.308482	0.308482	0.514268	0.308382	0.308382	0.308382	0.41154	0.385583	0.308482
petN CDS	0	0	0	0	0	0	0	0	0	0
psbM CDS	0	0	0	0	0	0	0	0	0	0
psbD CDS	0	0	0	0	0	0	0	0	0	0
psbC CDS	0	0	0	0	0	0	0	0	0	0
psbZ CDS	0	0	0	0	0	0	0	0	0	0
rps14 CDS	0	0	0	0	0	0	0	0	0	0
psaB CDS	0	0	0	0	0	0	0	0	0	0
psaA CDS	0	0	0	0	0	0	0	0	0	0
ycf3 CDS	0	0	0	0	0	0	0	0	0	0
rps4 CDS	0	0	0	0	0	0	0.314159	0.314159	0.156348	0
ndhJ CDS	0	0	0	0	0	0	0	0	0	0
ndhK CDS	0	0	0	0	0	0	0	0	0	0
ndhC CDS	0	0	0	0.298727	0.298727	0.298727	0	0	0	0.298727
atpE CDS	0	0	0	0	0	0	0	0	0	0
atpB CDS	0	0	0	0	0	0	0	0	0	0.110911
rbcL CDS	0.317649	0.317649	0.317649	0.211355	0.211355	0.211355	0.317649	0.317649	0.317649	0.211355
accD CDS	0.135268	0.135268	0.135268	0.407092	0.270691	0.270691	0.813172	0.813172	0.813172	0.270691
psaI CDS	0	0	0	0	0	0	0	0	0	0
ycf4 CDS	0.61593	0.61593	0.61593	0.61593	0.61593	0.61593	0.61593	0.61593	0.61593	0.61593
cemA CDS	0	0	0	0	0	0	0	0	0	0
petA CDS	0	0	0	0	0	0	0	0	0.154519	0
psbJ CDS	0	0	0	0	0	0	0	0	0	0
psbL CDS	0	0	0	0	0	0	0	0	0	0
psbF CDS	0	0	0	0	0	0	0	0	0	0
psbE CDS	0	0	0	0	0	0	0	0	0	0
petL CDS	0	0	0	0	0	0	0	0	0	0
petG CDS	0	0	0	0	0	0	0	0	0	0
psaJ CDS	0.030461	0.030461	0.030461	0.030461	0.030461	0.030461	0.030461	0.030461	0.030461	0.030461
rpl33 CDS	0	0	0	0	0	0	0	0	0	0
rps18 CDS	0	0	0	0	0	0	0.621179	0.621179	0.621179	0
rpl20 CDS	0	0	0	0	0	0	0	0	0	0
rps12 CDS	0	1.31701	1.31701	0	0	0	0	0	0	0
clpP CDS	0	0	0	0	0.322312	0.322312	0.322312	0	0	0
psbB CDS	0	0	0	0	0	0	0	0	0	0
psbT CDS	0	0	0	0	0	0	0	0	0	0
psbN CDS	0	0	0	0	0	0	0	0	0	0
psbH CDS	0	0	0	0	0	0	0	0	0	0
petB CDS	0	0	0	0	0	0	0	0	0	0
petD CDS	0	0	0	0	0	0	0	0.162655	0	0
rpoA CDS	0.369715	0.369715	0.369715	0.369715	0.369715	0.369715	0.27705	0.369715	0.462085	0.369715
rps11 CDS	0	0	0	0.358942	0.358942	0.358942	0	0	0	0.358942
rpl36 CDS	0	0	0	0	0	0	0	0	0	0
infA CDS	0	0	0	0	0	0	0	0.0181552	0	0
rps8 CDS	0	0	0	0	0	0	0	0	0	0
rpl14 CDS	0	0	0	0	0	0	0	0	0	0
rpl16 CDS	0	0	0	0	0	0	0.67108	0.334799	0.334799	0
rps3 CDS	0	0	0	0	0	0	0	0	0	0
rpl22 CDS	0.308115	0.308115	0.308115	0.308115	0.153129	0.153129	0.308115	0.308115	0.308115	0.308115
rps19 CDS	0.290007	0.458112	0.290007	0	0	0	0	0	0	0
rpl2 CDS	0	0	0	0	0	0	0	0	0	0
rpl23 CDS	0	0	0	0	0	0	0	0	0	0
ycf2 CDS	1.13641	1.13641	1.13641	1.4207	1.4207	1.4207	0.567957	0.709985	0.567957	1.13641
ycf15 CDS	0	0	0	0	0	0	0	0	0	0
ndhB CDS	0	0	0	0	0	0	0	0	0	0
rps7 CDS	0	0	0	0	0	0	0	0	0	0
ndhF CDS	1.08521	1.08521	1.08521	1.28353	0.961374	0.961374	0.715892	0.738613	0.738613	1.28243
rpl32 CDS	0	0	0	0	0	0	0	0	0	0
ccsA CDS	0	0	0	0	0	0	0	0	0	0
ndhD CDS	0.941503	0.941503	0.941503	0.313641	0.628454	0.628454	0.313851	0.313851	0.313851	0.628454
psaC CDS	0	0	0	0	0	0	0	0	0	0
ndhE CDS	0	0	0	0	0	0	0	0	0	0
ndhG CDS	0	0	0	0	0	0	0	0	0	0
ndhI CDS	0	0	0	0	0	0	0	0	0	0.150121
ndhA CDS	0	0	0	0	0	0	0.665567	0.665567	0.665567	0
ndhH CDS	0	0	0	0	0	0	0	0	0	0
rps15 CDS	0	0	0	0.5697	0.5697	0.5697	0	0	0	0
ycf1 CDS	0.86643	0.86643	0.86643	0.966408	0.866674	0.866674	0.666023	0.666365	0.799883	0.666086
