# Supplementary material for: Characterization and Comparative Analysis of Chloroplast Genomes of Medicinal Herb Scrophularia ningpoensis and Its Common Adulterants (Scrophulariaceae)
Source: Int J Mol Sci. 2023 Jun 12;24(12):10034. doi: 10.3390/ijms241210034 (PMC10298345; doi:10.3390/ijms241210034)
Supplement: Supplementary file 1 [file ijms-24-10034-s001.zip › Table S7.xlsx]

## Sheet: 600-200
Supplementary Table S7: Nucleotide variability(Pi) values and differential site(S) in Scrophularia.
Window	Midpoint	Pi	Theta	S
1-693	392	0.01115	0.00943	16
252-893	593	0.00681	0.00589	10
494-1093	793	0.00248	0.00236	4
694-1293	993	0.00078	0.00059	1
894-1493	1193	0.00078	0.00059	1
1094-1693	1393	0.00078	0.00059	1
1294-1893	1593	0	0	0
1494-2093	1793	0.00111	0.00118	2
1694-2293	1993	0.00111	0.00118	2
1894-2493	2193	0.00111	0.00118	2
2094-2693	2393	0.00078	0.00059	1
2294-2893	2593	0.00156	0.00118	2
2494-3093	2793	0.00189	0.00177	3
2694-3293	2993	0.00111	0.00118	2
2894-3493	3193	0.00067	0.00118	2
3094-3693	3393	0.00111	0.00118	2
3294-3894	3593	0.00111	0.00118	2
3494-4094	3793	0.00111	0.00118	2
3694-4299	3994	0.00111	0.00118	2
3895-4499	4199	0.00178	0.00236	4
4095-4704	4399	0.0027	0.00353	6
4300-4905	4599	0.0027	0.00353	6
4500-5114	4804	0.00204	0.00236	4
4705-5314	5014	0.00156	0.00118	2
4906-5514	5214	0.00078	0.00059	1
5115-5716	5414	0.00078	0.00059	1
5315-5917	5615	0.0017	0.00118	2
5515-6117	5817	0.00248	0.00177	3
5717-6317	6017	0.00326	0.00236	4
5918-6527	6217	0.00233	0.00177	3
6118-6727	6427	0.00156	0.00118	2
6318-6928	6627	0.00078	0.00059	1
6528-7128	6827	0.00156	0.00118	2
6728-7328	7028	0.00233	0.00177	3
6929-7528	7228	0.00344	0.00295	5
7129-7728	7428	0.00189	0.00177	3
7329-7928	7628	0.00111	0.00118	2
7529-8128	7828	0.00167	0.00118	2
7729-8328	8028	0.00167	0.00118	2
7929-8530	8228	0.00167	0.00118	2
8129-8730	8428	0.00156	0.00118	2
8329-8931	8630	0.00233	0.00177	3
8531-9133	8830	0.00233	0.00177	3
8731-9333	9033	0.00078	0.00059	1
8932-9535	9233	0	0	0
9134-9735	9433	0.00067	0.00118	2
9334-9941	9635	0.00067	0.00118	2
9536-10159	9841	0.00189	0.00236	4
9736-10359	10059	0.00122	0.00118	2
9942-10559	10259	0.002	0.00177	3
10160-10759	10459	0.00078	0.00059	1
10360-10959	10659	0.00156	0.00118	2
10560-11159	10859	0.00078	0.00059	1
10760-11359	11059	0.00078	0.00059	1
10960-11559	11259	0.00089	0.00059	1
11160-11759	11459	0.00089	0.00059	1
11360-11960	11659	0.00089	0.00059	1
11560-12160	11859	0	0	0
11760-12360	12060	0	0	0
11961-12562	12260	0.00078	0.00059	1
12161-12762	12460	0.00078	0.00059	1
12361-12962	12662	0.00156	0.00118	2
12563-13162	12862	0.00156	0.00118	2
12763-13366	13062	0.00233	0.00177	3
12963-13566	13262	0.00311	0.00236	4
13163-13766	13466	0.00233	0.00177	3
13367-13966	13666	0.00233	0.00177	3
13567-14166	13866	0.00078	0.00059	1
13767-14367	14066	0.00078	0.00059	1
13967-14572	14266	0	0	0
14167-14777	14467	0.00033	0.00059	1
14368-14977	14677	0.00033	0.00059	1
14573-15177	14877	0.00033	0.00059	1
14778-15377	15077	0	0	0
14978-15577	15277	0	0	0
15178-15777	15477	0.00078	0.00059	1
15378-15977	15677	0.00078	0.00059	1
15578-16177	15877	0.00078	0.00059	1
15778-16377	16077	0	0	0
15978-16578	16277	0.00089	0.00059	1
16178-16779	16478	0.00148	0.00118	2
16378-16979	16679	0.00148	0.00118	2
16579-17179	16879	0.00093	0.00118	2
16780-17379	17079	0.00111	0.00118	2
16980-17579	17279	0.00111	0.00118	2
17180-17779	17479	0.00078	0.00059	1
17380-17979	17679	0.00033	0.00059	1
17580-18179	17879	0.00033	0.00059	1
17780-18379	18079	0.00033	0.00059	1
17980-18579	18279	0	0	0
18180-18779	18479	0.00078	0.00059	1
18380-18982	18679	0.00078	0.00059	1
18580-19182	18879	0.00189	0.00177	3
18780-19382	19082	0.00111	0.00118	2
18983-19582	19282	0.00111	0.00118	2
19183-19782	19482	0	0	0
19383-19982	19682	0	0	0
19583-20182	19882	0	0	0
19783-20382	20082	0	0	0
19983-20582	20282	0	0	0
20183-20782	20482	0	0	0
20383-20982	20682	0	0	0
20583-21182	20882	0	0	0
20783-21382	21082	0	0	0
20983-21582	21282	0	0	0
21183-21782	21482	0	0	0
21383-21982	21682	0	0	0
21583-22182	21882	0	0	0
21783-22382	22082	0.00156	0.00118	2
21983-22582	22282	0.00156	0.00118	2
22183-22782	22482	0.00267	0.00236	4
22383-22982	22682	0.002	0.00177	3
22583-23182	22882	0.002	0.00177	3
22783-23382	23082	0.00089	0.00059	1
22983-23582	23282	0	0	0
23183-23782	23482	0.00033	0.00059	1
23383-23982	23682	0.00067	0.00118	2
23583-24182	23882	0.00067	0.00118	2
23783-24382	24082	0.001	0.00177	3
23983-24582	24282	0.00178	0.00236	4
24183-24782	24482	0.00237	0.00295	5
24383-24982	24682	0.0017	0.00177	3
24583-25182	24882	0.00059	0.00059	1
24783-25382	25082	0	0	0
24983-25582	25282	0.00033	0.00059	1
25183-25782	25482	0.00033	0.00059	1
25383-25982	25682	0.00033	0.00059	1
25583-26182	25882	0	0	0
25783-26382	26082	0.00078	0.00059	1
25983-26582	26282	0.00078	0.00059	1
26183-26782	26482	0.00078	0.00059	1
26383-26982	26682	0	0	0
26583-27182	26882	0	0	0
26783-27382	27082	0	0	0
26983-27582	27282	0.002	0.00177	3
27183-27782	27482	0.002	0.00177	3
27383-27993	27682	0.00233	0.00236	4
27583-28196	27882	0.00033	0.00059	1
27783-28396	28096	0.00033	0.00059	1
27994-28596	28296	0.00078	0.00059	1
28197-28796	28496	0.00156	0.00118	2
28397-28996	28696	0.00233	0.00177	3
28597-29196	28896	0.00233	0.00177	3
28797-29396	29096	0.00311	0.00236	4
28997-29596	29296	0.00233	0.00177	3
29197-29804	29496	0.00156	0.00118	2
29397-30250	29704	0	0	0
29597-30450	29904	0	0	0
29805-30650	30350	0.00059	0.00059	1
30251-30850	30550	0.00059	0.00059	1
30451-31051	30750	0.00093	0.00118	2
30651-31251	30951	0.00033	0.00059	1
30851-31451	31151	0.001	0.00177	3
31052-31651	31351	0.00067	0.00118	2
31252-31851	31551	0.00067	0.00118	2
31452-32056	31751	0.00078	0.00059	1
31652-32256	31951	0.00111	0.00118	2
31852-32456	32156	0.00111	0.00118	2
32057-32656	32356	0.00111	0.00118	2
32257-32856	32556	0.00111	0.00118	2
32457-33056	32756	0.00222	0.00236	4
32657-33256	32956	0.00144	0.00177	3
32857-33456	33156	0.00111	0.00118	2
33057-33656	33356	0	0	0
33257-33856	33556	0	0	0
33457-34056	33756	0.00211	0.00177	3
33657-34256	33956	0.00211	0.00177	3
33857-34456	34156	0.00211	0.00177	3
34057-34656	34356	0	0	0
34257-34856	34556	0	0	0
34457-35056	34756	0.00059	0.00059	1
34657-35256	34956	0.00059	0.00059	1
34857-35456	35156	0.00059	0.00059	1
35057-35656	35356	0	0	0
35257-35856	35556	0	0	0
35457-36056	35756	0	0	0
35657-36256	35956	0.00078	0.00059	1
35857-36456	36156	0.00078	0.00059	1
36057-36656	36356	0.00111	0.00118	2
36257-36857	36556	0.00267	0.00236	4
36457-37057	36756	0.00359	0.00353	6
36657-37260	36957	0.00481	0.00412	7
36858-37466	37157	0.00248	0.00236	4
37058-37666	37360	0.00156	0.00118	2
37261-37893	37566	0	0	0
37467-38093	37766	0	0	0
37667-38293	37993	0	0	0
37894-38493	38193	0	0	0
38094-38693	38393	0	0	0
38294-38893	38593	0	0	0
38494-39093	38793	0	0	0
38694-39293	38993	0	0	0
38894-39493	39193	0	0	0
39094-39693	39393	0	0	0
39294-39893	39593	0	0	0
39494-40093	39793	0	0	0
39694-40293	39993	0	0	0
39894-40493	40193	0	0	0
40094-40693	40393	0	0	0
40294-40893	40593	0	0	0
40494-41093	40793	0	0	0
40694-41293	40993	0	0	0
40894-41493	41193	0	0	0
41094-41693	41393	0	0	0
41294-41893	41593	0	0	0
41494-42093	41793	0	0	0
41694-42293	41993	0	0	0
41894-42493	42193	0.00078	0.00059	1
42094-42693	42393	0.00137	0.00118	2
42294-42893	42593	0.00137	0.00118	2
42494-43093	42793	0.00059	0.00059	1
42694-43302	42993	0.00059	0.00059	1
42894-43502	43202	0.00059	0.00059	1
43094-43702	43402	0.00137	0.00118	2
43303-43902	43602	0.00078	0.00059	1
43503-44103	43802	0.00078	0.00059	1
43703-44303	44002	0	0	0
43903-44503	44203	0.00078	0.00059	1
44104-44703	44403	0.00078	0.00059	1
44304-44903	44603	0.00078	0.00059	1
44504-45106	44803	0	0	0
44704-45310	45003	0.00078	0.00059	1
44904-45510	45206	0.00311	0.00236	4
45107-45710	45410	0.00311	0.00236	4
45311-45911	45610	0.00233	0.00177	3
45511-46111	45811	0.00059	0.00059	1
45711-46311	46011	0.00059	0.00059	1
45912-46511	46211	0.00248	0.00236	4
46112-46711	46411	0.00222	0.00236	4
46312-46911	46611	0.00222	0.00236	4
46512-47118	46811	0.00033	0.00059	1
46712-47372	47011	0.00211	0.00177	3
46912-47579	47272	0.00289	0.00236	4
47119-47779	47479	0.00533	0.00412	7
47373-48023	47679	0.00441	0.00353	6
47580-48223	47921	0.00363	0.00295	5
47780-48423	48123	0.00119	0.00118	2
48024-48623	48323	0	0	0
48224-48823	48523	0	0	0
48424-49023	48723	0.00196	0.00177	3
48624-49223	48923	0.00196	0.00177	3
48824-49423	49123	0.00407	0.00471	8
49024-49623	49323	0.00289	0.00353	6
49224-49823	49523	0.00367	0.00412	7
49424-50023	49723	0.00156	0.00118	2
49624-50223	49923	0.00078	0.00059	1
49824-50423	50123	0.00293	0.00236	4
50024-50626	50323	0.00604	0.00471	8
50224-50826	50526	0.00604	0.00471	8
50424-51026	50726	0.00311	0.00236	4
50627-51226	50926	0	0	0
50827-51426	51126	0	0	0
51027-51626	51326	0.00089	0.00059	1
51227-51829	51526	0.00089	0.00059	1
51427-52039	51726	0.00089	0.00059	1
51627-52239	51929	0.00078	0.00059	1
51830-52439	52139	0.00078	0.00059	1
52040-52639	52339	0.00222	0.00236	4
52240-52851	52539	0.00144	0.00177	3
52440-53051	52750	0.00144	0.00177	3
52640-53251	52951	0.00156	0.00118	2
52852-53451	53151	0.00156	0.00118	2
53052-53651	53351	0.00156	0.00118	2
53252-53851	53551	0.00078	0.00059	1
53452-54051	53751	0.00078	0.00059	1
53652-54251	53951	0.00111	0.00118	2
53852-54451	54151	0.00033	0.00059	1
54052-54651	54351	0.00033	0.00059	1
54252-54851	54551	0	0	0
54452-55051	54751	0	0	0
54652-55251	54951	0.00111	0.00118	2
54852-55451	55151	0.00111	0.00118	2
55052-55651	55351	0.0017	0.00177	3
55252-55851	55551	0.00059	0.00059	1
55452-56062	55751	0.00059	0.00059	1
55652-56262	55951	0.00078	0.00059	1
55852-56462	56162	0.00078	0.00059	1
56063-56662	56362	0.00078	0.00059	1
56263-56862	56562	0	0	0
56463-57062	56762	0	0	0
56663-57262	56962	0	0	0
56863-57462	57162	0	0	0
57063-57662	57362	0	0	0
57263-57862	57562	0.00089	0.00059	1
57463-58062	57762	0.00089	0.00059	1
57663-58262	57962	0.00333	0.00236	4
57863-58464	58162	0.00278	0.00236	4
58063-58664	58364	0.00433	0.00353	6
58263-58864	58564	0.00267	0.00236	4
58465-59064	58764	0.00267	0.00236	4
58665-59264	58964	0.00111	0.00118	2
58865-59464	59164	0.00033	0.00059	1
59065-59664	59364	0.00089	0.00059	1
59265-59864	59564	0.00167	0.00118	2
59465-60064	59764	0.00167	0.00118	2
59665-60272	59964	0.00078	0.00059	1
59865-60472	60164	0	0	0
60065-60672	60372	0	0	0
60273-60874	60572	0	0	0
60473-61074	60772	0	0	0
60673-61274	60974	0	0	0
60875-61474	61174	0	0	0
61075-61674	61374	0	0	0
61275-61875	61574	0.00078	0.00059	1
61475-62075	61774	0.002	0.00177	3
61675-62275	61975	0.00233	0.00236	4
61876-62475	62175	0.00156	0.00177	3
62076-62675	62375	0.00033	0.00059	1
62276-62875	62575	0	0	0
62476-63075	62775	0	0	0
62676-63275	62975	0	0	0
62876-63475	63175	0.00033	0.00059	1
63076-63675	63375	0.00067	0.00118	2
63276-63875	63575	0.00067	0.00118	2
63476-64076	63775	0.00189	0.00177	3
63676-64277	63975	0.00156	0.00118	2
63876-64478	64177	0.00267	0.00236	4
64078-64678	64377	0.00111	0.00118	2
64278-64878	64578	0.00144	0.00177	3
64479-65078	64778	0.00148	0.00118	2
64679-65278	64978	0.00148	0.00118	2
64879-65478	65178	0.00115	0.00059	1
65079-65678	65378	0	0	0
65279-65878	65578	0	0	0
65479-66078	65778	0.00122	0.00118	2
65679-66278	65978	0.00337	0.00295	5
65879-66478	66178	0.00404	0.00412	7
66079-66683	66378	0.00281	0.00295	5
66279-66883	66583	0.00067	0.00118	2
66479-67083	66783	0	0	0
66684-67283	66983	0.00078	0.00059	1
66884-67483	67183	0.00078	0.00059	1
67084-67683	67383	0.00078	0.00059	1
67284-67884	67583	0.00167	0.00118	2
67484-68084	67783	0.002	0.00177	3
67684-68284	67984	0.00311	0.00295	5
67885-68484	68184	0.00222	0.00236	4
68085-68693	68384	0.00189	0.00177	3
68285-68893	68584	0.00078	0.00059	1
68485-69093	68793	0.00078	0.00059	1
68694-69295	68993	0.00156	0.00118	2
68894-69495	69193	0.00156	0.00118	2
69094-69695	69395	0.00078	0.00059	1
69296-69898	69595	0	0	0
69496-70104	69795	0	0	0
69696-70304	70004	0	0	0
69899-70505	70204	0.00078	0.00059	1
70105-70705	70404	0.00078	0.00059	1
70305-70905	70605	0.00137	0.00118	2
70506-71105	70805	0.00059	0.00059	1
70706-71313	71005	0.00215	0.00177	3
70906-71519	71213	0.00189	0.00177	3
71106-71719	71419	0.00248	0.00236	4
71314-71919	71619	0.00126	0.00177	3
71520-72120	71819	0.00093	0.00118	2
71720-72320	72020	0.00033	0.00059	1
71920-72520	72220	0.00078	0.00059	1
72121-72720	72420	0.00137	0.00118	2
72321-72920	72620	0.00137	0.00118	2
72521-73120	72820	0.00059	0.00059	1
72721-73320	73020	0.00089	0.00059	1
72921-73520	73220	0.00089	0.00059	1
73121-73720	73420	0.00122	0.00118	2
73321-73920	73620	0.00033	0.00059	1
73521-74120	73820	0.00033	0.00059	1
73721-74320	74020	0	0	0
73921-74520	74220	0.00089	0.00059	1
74121-74720	74420	0.00089	0.00059	1
74321-74921	74620	0.00122	0.00118	2
74521-75121	74820	0.00152	0.00177	3
74721-75321	75021	0.00152	0.00177	3
74922-75521	75221	0.00119	0.00118	2
75122-75721	75421	0	0	0
75322-75923	75621	0.00033	0.00059	1
75522-76123	75821	0.00033	0.00059	1
75722-76323	76023	0.00033	0.00059	1
75924-76523	76223	0.00033	0.00059	1
76124-76723	76423	0.00033	0.00059	1
76324-76923	76623	0.00033	0.00059	1
76524-77123	76823	0	0	0
76724-77323	77023	0.00033	0.00059	1
76924-77523	77223	0.00033	0.00059	1
77124-77723	77423	0.00033	0.00059	1
77324-77923	77623	0.00078	0.00059	1
77524-78123	77823	0.00156	0.00118	2
77724-78323	78023	0.00156	0.00118	2
77924-78523	78223	0.00111	0.00118	2
78124-78725	78423	0.00111	0.00118	2
78324-78925	78625	0.00256	0.00295	5
78524-79125	78825	0.00222	0.00236	4
78726-79325	79025	0.00144	0.00177	3
78926-79525	79225	0	0	0
79126-79725	79425	0.00033	0.00059	1
79326-79925	79625	0.00033	0.00059	1
79526-80125	79825	0.00122	0.00118	2
79726-80325	80025	0.00089	0.00059	1
79926-80526	80225	0.00089	0.00059	1
80126-80726	80426	0.00033	0.00059	1
80326-80926	80626	0.00144	0.00177	3
80527-81126	80826	0.00178	0.00236	4
80727-81329	81026	0.00222	0.00236	4
80927-81529	81226	0.00111	0.00118	2
81127-81729	81429	0.00078	0.00059	1
81330-81929	81629	0.00111	0.00118	2
81530-82129	81829	0.00111	0.00118	2
81730-82329	82029	0.00111	0.00118	2
81930-82532	82229	0.00111	0.00118	2
82130-82732	82429	0.00178	0.00236	4
82330-82932	82632	0.00256	0.00295	5
82533-83134	82832	0.00144	0.00177	3
82733-83335	83034	0.00078	0.00059	1
82933-83535	83235	0	0	0
83135-83735	83435	0	0	0
83336-83935	83635	0	0	0
83536-84135	83835	0	0	0
83736-84335	84035	0.00059	0.00059	1
83936-84535	84235	0.00137	0.00118	2
84136-84735	84435	0.00137	0.00118	2
84336-84936	84635	0.00078	0.00059	1
84536-85136	84836	0.00078	0.00059	1
84736-85336	85036	0.00078	0.00059	1
84937-85536	85236	0.00078	0.00059	1
85137-85736	85436	0	0	0
85337-85936	85636	0	0	0
85537-86136	85836	0	0	0
85737-86336	86036	0	0	0
85937-86536	86236	0	0	0
86137-86736	86436	0	0	0
86337-86936	86636	0	0	0
86537-87136	86836	0	0	0
86737-87336	87036	0	0	0
86937-87536	87236	0.00078	0.00059	1
87137-87736	87436	0.00078	0.00059	1
87337-87936	87636	0.00078	0.00059	1
87537-88136	87836	0	0	0
87737-88336	88036	0	0	0
87937-88536	88236	0	0	0
88137-88736	88436	0	0	0
88337-88936	88636	0	0	0
88537-89136	88836	0	0	0
88737-89336	89036	0	0	0
88937-89536	89236	0	0	0
89137-89736	89436	0	0	0
89337-89936	89636	0	0	0
89537-90136	89836	0	0	0
89737-90336	90036	0	0	0
89937-90536	90236	0	0	0
90137-90736	90436	0	0	0
90337-90936	90636	0	0	0
90537-91136	90836	0.00078	0.00059	1
90737-91336	91036	0.00078	0.00059	1
90937-91536	91236	0.00111	0.00118	2
91137-91736	91436	0.00033	0.00059	1
91337-91936	91636	0.00033	0.00059	1
91537-92136	91836	0	0	0
91737-92336	92036	0	0	0
91937-92536	92236	0	0	0
92137-92736	92436	0	0	0
92337-92936	92636	0	0	0
92537-93136	92836	0	0	0
92737-93336	93036	0	0	0
92937-93536	93236	0	0	0
93137-93736	93436	0	0	0
93337-93936	93636	0	0	0
93537-94136	93836	0	0	0
93737-94336	94036	0	0	0
93937-94536	94236	0	0	0
94137-94736	94436	0	0	0
94337-94936	94636	0	0	0
94537-95137	94836	0	0	0
94737-95337	95037	0	0	0
94937-95537	95237	0	0	0
95138-95737	95437	0	0	0
95338-95937	95637	0	0	0
95538-96137	95837	0.00078	0.00059	1
95738-96337	96037	0.00078	0.00059	1
95938-96537	96237	0.00078	0.00059	1
96138-96737	96437	0	0	0
96338-96937	96637	0	0	0
96538-97137	96837	0	0	0
96738-97337	97037	0	0	0
96938-97537	97237	0	0	0
97138-97737	97437	0	0	0
97338-97937	97637	0.00033	0.00059	1
97538-98137	97837	0.00033	0.00059	1
97738-98337	98037	0.00033	0.00059	1
97938-98537	98237	0	0	0
98138-98737	98437	0	0	0
98338-98937	98637	0	0	0
98538-99137	98837	0	0	0
98738-99346	99037	0.00078	0.00059	1
98938-99546	99242	0.00078	0.00059	1
99138-99746	99446	0.00078	0.00059	1
99347-99952	99646	0	0	0
99547-100152	99852	0.00078	0.00059	1
99747-100352	100052	0.00078	0.00059	1
99953-100557	100252	0.00111	0.00118	2
100153-100757	100452	0.00033	0.00059	1
100353-100957	100657	0.00033	0.00059	1
100558-101157	100857	0	0	0
100758-101357	101057	0	0	0
100958-101557	101257	0	0	0
101158-101757	101457	0	0	0
101358-101957	101657	0	0	0
101558-102157	101857	0	0	0
101758-102357	102057	0	0	0
101958-102557	102257	0.00078	0.00059	1
102158-102757	102457	0.00078	0.00059	1
102358-102957	102657	0.00078	0.00059	1
102558-103157	102857	0	0	0
102758-103357	103057	0	0	0
102958-103557	103257	0	0	0
103158-103757	103457	0	0	0
103358-103957	103657	0	0	0
103558-104157	103857	0	0	0
103758-104357	104057	0	0	0
103958-104557	104257	0	0	0
104158-104757	104457	0	0	0
104358-104957	104657	0	0	0
104558-105157	104857	0	0	0
104758-105357	105057	0	0	0
104958-105557	105257	0	0	0
105158-105757	105457	0	0	0
105358-105957	105657	0	0	0
105558-106157	105857	0	0	0
105758-106357	106057	0.00078	0.00059	1
105958-106557	106257	0.00078	0.00059	1
106158-106757	106457	0.00078	0.00059	1
106358-106957	106657	0	0	0
106558-107157	106857	0	0	0
106758-107357	107057	0	0	0
106958-107557	107257	0	0	0
107158-107757	107457	0	0	0
107358-107957	107657	0	0	0
107558-108157	107857	0	0	0
107758-108357	108057	0	0	0
107958-108699	108257	0.00078	0.00059	1
108158-108899	108599	0.00078	0.00059	1
108358-109099	108799	0.00078	0.00059	1
108700-109299	108999	0	0	0
108900-109499	109199	0	0	0
109100-109699	109399	0	0	0
109300-109899	109599	0	0	0
109500-110099	109799	0	0	0
109700-110299	109999	0	0	0
109900-110517	110199	0	0	0
110100-110717	110417	0.00189	0.00236	4
110300-110917	110617	0.00344	0.00353	6
110518-111117	110817	0.00422	0.00412	7
110718-111317	111017	0.00467	0.00353	6
110918-111517	111217	0.00311	0.00236	4
111118-111717	111417	0.00233	0.00177	3
111318-111917	111617	0.00137	0.00118	2
111518-112117	111817	0.00137	0.00118	2
111718-112317	112017	0.00137	0.00118	2
111918-112517	112217	0.00111	0.00118	2
112118-112717	112417	0.002	0.00177	3
112318-112921	112617	0.00311	0.00295	5
112518-113121	112817	0.00233	0.00236	4
112718-113321	113021	0.00144	0.00177	3
112922-113522	113221	0.00211	0.00295	5
113122-113739	113421	0.00178	0.00236	4
113322-113939	113639	0.00289	0.00353	6
113523-114139	113839	0.00281	0.00295	5
113740-114339	114039	0.00281	0.00295	5
113940-114539	114239	0.00326	0.00295	5
114140-114739	114439	0.00233	0.00177	3
114340-114939	114639	0.00233	0.00177	3
114540-115139	114839	0.00078	0.00059	1
114740-115339	115039	0	0	0
114940-115543	115239	0.00033	0.00059	1
115140-115743	115443	0.00033	0.00059	1
115340-115943	115643	0.00111	0.00118	2
115544-116143	115843	0.00111	0.00118	2
115744-116343	116043	0.00189	0.00177	3
115944-116543	116243	0.00111	0.00118	2
116144-116743	116443	0.00078	0.00059	1
116344-116943	116643	0	0	0
116544-117143	116843	0.00089	0.00059	1
116744-117344	117043	0.00581	0.0053	9
116944-117544	117244	0.00581	0.0053	9
117144-117744	117444	0.00493	0.00471	8
117345-117944	117644	0	0	0
117545-118144	117844	0.00078	0.00059	1
117745-118344	118044	0.00156	0.00118	2
117945-118544	118244	0.00156	0.00118	2
118145-118744	118444	0.00078	0.00059	1
118345-118944	118644	0	0	0
118545-119144	118844	0	0	0
118745-119344	119044	0.00033	0.00059	1
118945-119544	119244	0.00067	0.00118	2
119145-119762	119444	0.00067	0.00118	2
119345-119962	119644	0.00111	0.00118	2
119545-120162	119862	0.00156	0.00118	2
119763-120362	120062	0.00156	0.00118	2
119963-120562	120262	0.00189	0.00177	3
120163-120763	120462	0.00222	0.00236	4
120363-120963	120662	0.00222	0.00236	4
120563-121163	120863	0.00189	0.00177	3
120764-121363	121063	0.00244	0.00177	3
120964-121563	121263	0.00244	0.00177	3
121164-121763	121463	0.00167	0.00118	2
121364-121963	121663	0.00078	0.00059	1
121564-122163	121863	0.00078	0.00059	1
121764-122363	122063	0.00078	0.00059	1
121964-122563	122263	0	0	0
122164-122763	122463	0.00089	0.00059	1
122364-122963	122663	0.00089	0.00059	1
122564-123163	122863	0.00167	0.00118	2
122764-123363	123063	0.00167	0.00118	2
122964-123563	123263	0.00322	0.00236	4
123164-123763	123463	0.00304	0.00236	4
123364-123964	123663	0.00215	0.00177	3
123564-124164	123864	0.00093	0.00118	2
123764-124364	124064	0.00033	0.00059	1
123965-124564	124264	0.00067	0.00118	2
124165-124764	124464	0.00111	0.00118	2
124365-124964	124664	0.00111	0.00118	2
124565-125164	124864	0.00156	0.00118	2
124765-125364	125064	0.00267	0.00236	4
124965-125564	125264	0.00344	0.00295	5
125165-125764	125464	0.00333	0.00353	6
125365-125964	125664	0.00144	0.00177	3
125565-126164	125864	0.00133	0.00236	4
125765-126364	126064	0.00222	0.00236	4
125965-126564	126264	0.003	0.00295	5
126165-126764	126464	0.00311	0.00236	4
126365-126964	126664	0.00233	0.00177	3
126565-127164	126864	0.00233	0.00177	3
126765-127364	127064	0.00189	0.00177	3
126965-127564	127264	0.00189	0.00177	3
127165-127764	127464	0.00189	0.00177	3
127365-127964	127664	0.00156	0.00118	2
127565-128164	127864	0.00111	0.00118	2
127765-128382	128064	0.00111	0.00118	2
127965-128582	128264	0.00111	0.00118	2
128165-128782	128482	0.00078	0.00059	1
128383-128982	128682	0	0	0
128583-129182	128882	0	0	0
128783-129382	129082	0	0	0
128983-129582	129282	0	0	0
129183-129782	129482	0	0	0
129383-129982	129682	0	0	0
129583-130324	129882	0.00078	0.00059	1
129783-130524	130224	0.00078	0.00059	1
129983-130724	130424	0.00078	0.00059	1
130325-130924	130624	0	0	0
130525-131124	130824	0	0	0
130725-131324	131024	0	0	0
130925-131524	131224	0	0	0
131125-131724	131424	0	0	0
131325-131924	131624	0	0	0
131525-132124	131824	0	0	0
131725-132324	132024	0	0	0
131925-132524	132224	0.00078	0.00059	1
132125-132724	132424	0.00078	0.00059	1
132325-132924	132624	0.00078	0.00059	1
132525-133124	132824	0	0	0
132725-133324	133024	0	0	0
132925-133524	133224	0	0	0
133125-133724	133424	0	0	0
133325-133924	133624	0	0	0
133525-134124	133824	0	0	0
133725-134324	134024	0	0	0
133925-134524	134224	0	0	0
134125-134724	134424	0	0	0
134325-134924	134624	0	0	0
134525-135124	134824	0	0	0
134725-135324	135024	0	0	0
134925-135524	135224	0	0	0
135125-135724	135424	0	0	0
135325-135924	135624	0	0	0
135525-136124	135824	0	0	0
135725-136324	136024	0.00078	0.00059	1
135925-136524	136224	0.00078	0.00059	1
136125-136724	136424	0.00078	0.00059	1
136325-136924	136624	0	0	0
136525-137124	136824	0	0	0
136725-137324	137024	0	0	0
136925-137524	137224	0	0	0
137125-137724	137424	0	0	0
137325-137924	137624	0	0	0
137525-138129	137824	0.00033	0.00059	1
137725-138329	138024	0.00033	0.00059	1
137925-138529	138229	0.00033	0.00059	1
138130-138729	138429	0.00078	0.00059	1
138330-138935	138629	0.00078	0.00059	1
138530-139135	138835	0.00078	0.00059	1
138730-139339	139035	0	0	0
138936-139544	139235	0.00078	0.00059	1
139136-139744	139439	0.00078	0.00059	1
139340-139944	139644	0.00078	0.00059	1
139545-140144	139844	0	0	0
139745-140344	140044	0	0	0
139945-140544	140244	0	0	0
140145-140744	140444	0	0	0
140345-140944	140644	0.00033	0.00059	1
140545-141144	140844	0.00033	0.00059	1
140745-141344	141044	0.00033	0.00059	1
140945-141544	141244	0	0	0
141145-141744	141444	0	0	0
141345-141944	141644	0	0	0
141545-142144	141844	0	0	0
141745-142344	142044	0	0	0
141945-142544	142244	0	0	0
142145-142744	142444	0.00078	0.00059	1
142345-142944	142644	0.00078	0.00059	1
142545-143144	142844	0.00078	0.00059	1
142745-143344	143044	0	0	0
142945-143544	143244	0	0	0
143145-143745	143444	0	0	0
143345-143945	143645	0	0	0
143545-144145	143845	0	0	0
143746-144345	144045	0	0	0
143946-144545	144245	0	0	0
144146-144745	144445	0	0	0
144346-144945	144645	0	0	0
144546-145145	144845	0	0	0
144746-145345	145045	0	0	0
144946-145545	145245	0	0	0
145146-145745	145445	0	0	0
145346-145945	145645	0	0	0
145546-146145	145845	0	0	0
145746-146345	146045	0	0	0
145946-146545	146245	0	0	0
146146-146745	146445	0	0	0
146346-146945	146645	0	0	0
146546-147145	146845	0	0	0
146746-147345	147045	0.00033	0.00059	1
146946-147545	147245	0.00033	0.00059	1
147146-147745	147445	0.00111	0.00118	2
147346-147945	147645	0.00078	0.00059	1
147546-148145	147845	0.00078	0.00059	1
147746-148345	148045	0	0	0
147946-148545	148245	0	0	0
148146-148745	148445	0	0	0
148346-148945	148645	0	0	0
148546-149145	148845	0	0	0
148746-149345	149045	0	0	0
148946-149545	149245	0	0	0
149146-149745	149445	0	0	0
149346-149945	149645	0	0	0
149546-150145	149845	0	0	0
149746-150345	150045	0	0	0
149946-150545	150245	0	0	0
150146-150745	150445	0	0	0
150346-150945	150645	0	0	0
150546-151145	150845	0.00078	0.00059	1
150746-151345	151045	0.00078	0.00059	1
150946-151545	151245	0.00078	0.00059	1
151146-151745	151445	0	0	0
151346-151945	151645	0	0	0
151546-152145	151845	0	0	0
151746-152345	152045	0	0	0
151946-152545	152245	0	0	0
152146-152745	152445	0	0	0
152346-152945	152645	0	0	0
152546-153145	152845	0	0	0
152746-153345	153045	0	0	0
152946-153545	153245	0	0	0
153146-153745	153445	0.00078	0.00059	1
153346-153946	153645	0.00078	0.00059	1
153546-153959	153750	0.00114	0.00086	1
